1 **Narrowly confined and glomerulus-specific onset latencies of odor-evoked calcium**  
2 **transients in the periglomerular cells of the mouse main olfactory bulb**

3 Ryota Homma\*<sup>1</sup>, Xiaohua Lv\*<sup>1,2,3</sup>, Tokiharu Sato<sup>1</sup>, Fumiaki Imamura<sup>4</sup>, Shaoqun Zeng<sup>2,3</sup>, Shin  
4 Nagayama<sup>1</sup>

5 1. Department of Neurobiology and Anatomy, McGovern Medical School at The University of Texas Health  
6 Science Center at Houston, Houston, TX, 77030

7 2. Britton Chance Center for Biomedical Photonics, Wuhan National Laboratory for Optoelectronics, Huazhong  
8 University of Science and Technology, Wuhan, 430074, China

9 3. MoE Key Laboratory for Biomedical Photonics, Collaborative Innovation Center for Biomedical Engineering,  
10 School of Engineering Sciences, Huazhong University of Science and Technology, Wuhan, 430074, China

11 4. Department of Pharmacology, Pennsylvania State University College of Medicine, Hershey, PA, 17033

12 \* R. H. and X. L. contributed equally to the work.

13

14 **Corresponding authors**

15 Shin Nagayama

16 P.O. Box 20708 Houston, TX 77225-0708

17 Shin.Nagayama@uth.tmc.edu

18 Ryota Homma

19 P.O. Box 20708 Houston, TX 77225-0708

20 Ryota.Homma@uth.tmc.edu

21

22 **Acknowledgments**

23 We thank Wei Chen for his contribution to the setup of the acousto-optic deflector two-photon  
24 microscope. S.N. is supported by NIH/NIDCD Grant R01DC013802. F.I. is supported by NIH/NIDCD  
25 Grant R01DC016307. S.Z. and X.L. are supported by NSFC Grant 81327802.

26

27

28 **Abstract**

29 Odor information is transmitted from olfactory sensory neurons to principal neurons at the glomeruli of  
30 the olfactory bulb. The intraglomerular neuronal circuit also includes hundreds of GABAergic  
31 interneurons referred to as periglomerular (PG) cells. Stimulus selectivity is well correlated among PG  
32 cells that are associated with the same glomerulus, consistent with their highly homogeneous sensory  
33 inputs. However, much less is known about the temporal aspects of their activity, including the temporal  
34 coordination of their odor-evoked responses. As many PG cells within a glomerular module respond to  
35 the same stimulus, the extent to which their activity is temporally aligned will affect the temporal profile  
36 of their population inhibitory inputs. Using random-access high-speed two-photon microscopy, we  
37 recorded the odor-evoked calcium transients of mouse PG cells and compared the onset latency and rise  
38 time among neurons putatively associated with the same and different glomeruli. Whereas the overall  
39 onset latencies of odor-evoked transients were distributed across a ~150 ms time window, those from  
40 cells putatively associated with the same glomerulus were confined to a much narrower window of  
41 several tens of milliseconds. This result suggests that onset latency primarily depends on the associated  
42 glomerulus. We also observed glomerular specificity in the rise time. The glomerulus-specific temporal  
43 pattern of odor-evoked activity implies that the temporal patterns of inhibitory inputs are unique to  
44 individual glomerulus–odor pairs, which may contribute to efficient shaping of the temporal pattern of  
45 activity in the principal neurons.

46

47

48

## 49 **Introduction**

50 The glomeruli in the olfactory bulb (OB) form an attractive model system for studying signal  
51 processing owing to their well-documented neurons and characteristic anatomy, in which the input and  
52 output pathways are well segregated. In a glomerulus, sensory inputs from olfactory sensory neurons  
53 (OSNs) are transmitted to mitral/tufted cells, which in turn send the signals to higher olfactory centers.  
54 Signal processing in the glomerulus involves feedforward excitation and inhibition mediated by hundreds  
55 of juxtglomerular (JG) cells, the diverse interneurons (see below) located in the glomerular layer (GL)  
56 (De Saint Jan et al., 2009; Najac et al., 2011; Shao et al., 2012; Carey et al., 2015; Geramita and Urban,  
57 2017). One remarkable trait of these feedforward circuits is that each type of feedforward input  
58 (excitatory or inhibitory) to a glomerulus is mediated by numerous JG cells of a specific type. The  
59 properties of collective feedforward inputs thus depend on the extent to which the activity of participating  
60 neurons is temporally coordinated. However, little is known about the temporal patterns of activity among  
61 JG cells that are associated with the same glomerulus.

62 The term “JG cell” is a generic name for interneurons in the GL and includes multiple types of  
63 neurons: major JG cell types include GABAergic periglomerular (PG) cells, glutamatergic external tufted  
64 (ET) cells, and GABAergic/dopaminergic superficial short-axon (sSA) cells (Nagayama et al., 2014). PG  
65 cells are the most abundant cell type among JG cells. They are monoglomerular (their dendrites project to  
66 a single glomerulus) and they receive sensory inputs directly from OSNs or disynaptically from ET cells,  
67 depending on the PG cell subtype. ET cells are also monoglomerular and receive direct input from OSNs.  
68 These two cell types are the sources of feedforward inhibition and excitation, respectively, in the  
69 intraglomerular circuit. The neuronal processes of sSA cells cross multiple glomeruli and are believed to  
70 mediate interactions among glomeruli within the GL (Kiyokage et al., 2010). The cellular properties and  
71 connectivity of these neurons, including their subtypes, have been extensively studied (Wachowiak and  
72 Shipley, 2006; Kosaka and Kosaka 2014, 2016; Burton 2017).

73 The basic functional properties of JG cells have been revealed previously by *in vivo* recordings (Wellis  
74 and Scott, 1990; Tan et al., 2010; Homma et al., 2013; Kikuta et al., 2013; Wachowiak et al., 2013;  
75 Fukunaga et al., 2014; Livneh et al., 2014). For example, JG cells fire spontaneously at various rates; this  
76 spontaneous activity is phasic and tuned to respiration phase in the majority of cells. In response to odors,  
77 JG cell firing increases or decreases and/or shifts in phase. The relationship between glomerular inputs  
78 and JG cells has been studied via electrophysiological recordings in genetically tagged glomeruli (Tan et  
79 al., 2010), and via calcium imaging with glomerulus-specific labeling (Kikuta et al., 2013). The odor  
80 selectivity of JG cells is correlated with that of OSNs as well as with that of other JG cells associated with  
81 the same glomerulus. However, neither technique allows simultaneous recording from multiple JG cells at  
82 sufficient temporal resolution to analyze how the activity of these cells is temporally coordinated. In this  
83 study, we used high-speed two-photon calcium recording (Grewe et al., 2010) to compare the calcium  
84 transients in JG cells within and across glomeruli at a high temporal resolution. We demonstrated that the  
85 time course of odor-evoked calcium transients is primarily determined by the glomerulus. The onset  
86 latency of JG cells was highly heterogeneous, with a ~150 ms difference between the earliest and the  
87 latest responses, but onset latency was confined to a much narrower window when we considered only the  
88 cells putatively associated with the same glomerulus. Such coordinated activity in JG cells could help to  
89 efficiently shape the time course of sensory inputs that are unique to the associated glomerulus.

90

## 91 **Materials and Methods**

### 92 **Materials**

93 Eight mice (one female) that were the progeny of a *Gad2-IRES-Cre* mouse (Taniguchi et al., 2011;  
94 JAX Stock No. 10802; RRID:IMSR\_JAX:010802) and a cre-recombinase-dependent tdTomato reporter  
95 mouse (*Ai9*; Madisen et al., 2010; JAX Stock No. 7909; RRID:IMSR\_JAX:007909) were used in this  
96 study. An adeno-associated virus (AAV) vector that encodes the *GCaMP6f* gene under the synapsin

97 promoter (AAV1.Syn.GCaMP6f.WPRE.SV40) was purchased from the UPenn Vector Core. All odorants  
98 were purchased from Sigma-Aldrich.

## 99 **Animal preparation**

100 All animal procedures were conducted in accordance with an animal protocol that was approved by the  
101 Institutional Animal Care and Use Committee (IACUC) of UTHealth.

102 *Viral injections.* Animals were anesthetized with an intraperitoneal injection of ketamine/xylazine  
103 (10/0.5 mg/ml k/x, 12  $\mu$ l/g bodyweight). The depth of anesthesia was routinely monitored by toe pinches,  
104 and additional injections of anesthetic were made to maintain the appropriate depth of anesthesia. Rectal  
105 body temperature was maintained between 36.0°C and 37.0°C. The skull above the dorsal OBs was  
106 exposed, and two small holes corresponding to two injection sites were made above the posterior end of  
107 one OB. For each injection, a glass pipette containing the AAV suspension (no dilution:  $9 \times 10^{12}$  GC/ml)  
108 was inserted through one of the holes. The pipette approached from the posterior side of the animal,  
109 parallel to the A–P axis and tilted 30°–45° from vertical. The tip of the pipette was advanced 250–300  $\mu$ m  
110 from the bulbar surface. A 320–640 nl injection was made at the rate of 64–128 nl/min with a Nanoject II  
111 oil-pressure injector (Drummond) in each of the two injection sites. After surgery, mice were left to  
112 recover undisturbed for 15–34 days before the recording session. With this injection protocol, uniform  
113 labeling of the entire dorsal OB was observed under a fluorescence microscope. In some of the animals  
114 (labeled mice 6–8 in the figures), a cranial window was implanted during the surgery for the AAV  
115 injections. In these animals, a metal head-plate with a 5 mm round hole (CP-1, Narishige) was attached to  
116 the skull with cyanoacrylate glue and dental acrylic. A round cranial window (~3 mm in diameter) that  
117 covered both dorsal bulbs was made through the hole of the head-plate. The dura mater was not removed.  
118 The exposed bulb was sealed with 0.8% agarose and a 3 mm round coverslip (CS-3R, Warner  
119 Instruments), which was cemented with cyanoacrylate glue and dental acrylic.

120 *Data acquisition.* Animals previously injected with AAV were anesthetized with an intraperitoneal  
121 injection of urethane (6% w/v, 20  $\mu$ l/g bodyweight for induction, with the depth of anesthesia monitored  
122 by toe pinches and maintained by additional injections). Animals breathed freely throughout the  
123 experiment, and rectal body temperature was maintained between 36.0°C and 37.0°C. Animals with a  
124 pre-installed cranial window (see above) were transferred to the microscope stage once the level of  
125 anesthesia was stable. For animals without a pre-installed cranial window, a metal head-plate was  
126 attached to the skull with cyanoacrylate glue and dental acrylic. Then, a craniotomy was made in the  
127 AAV-injected side of the OB and the opening was filled with 1.2% agarose and sealed with a pre-cut  
128 piece of coverslip, which was cemented with cyanoacrylate glue. Following the cranial window  
129 preparation, the animal was transferred to the microscope stage. The microscope stage was equipped with  
130 an angle-adjustable stage (MAG-3, Narishige) to allow fine adjustments of the angle of the bulbar surface  
131 relative to the objective. Breathing was monitored with a piezo-electric sensor placed beneath the chest,  
132 and the signal was recorded together with the optical signals.

### 133 **Optical recordings**

134 All optical recordings (i.e., wide-field and two-photon) were conducted with the same upright  
135 fluorescence microscope (Olympus) combined with a motorized stage (Scientifica). All optics were  
136 implemented on a vibration-isolating air table (Newport). For wide-field imaging, the excitation light was  
137 provided by a 470 nm LED module (M470L2, Thorlabs). The filter set was a standard GFP cube (GFP-  
138 4050A-OMF-ZERO, Semrock; 466/495/525 nm exciter/DM/emitter). A 10 $\times$ /0.3 NA objective lens  
139 (Olympus) and a 0.35 $\times$  tube lens (Olympus) were used, and the images were captured by a high-speed  
140 CCD camera (NeuroCCD-SM256, RedShirtImaging) at 125 Hz for 12 s. With this configuration, a 1.75  $\times$   
141 1.75 mm<sup>2</sup> area of bulbar surface was imaged at 128  $\times$  128 pixels. For two-photon recordings, a custom-  
142 built acousto-optic deflector (AOD)-based two-photon scanner that is capable of random-access recording  
143 was used (Iyer et al., 2006; Grewe et al., 2010). Random-access scanning is a mode of two-photon  
144 recording that allows one to record from only an arbitrary set of pre-designated pixels in the field of view,

145 typically at a much higher sampling rate than conventional full-field imaging. A random-access pattern  
146 scanning mode was adopted (Grewe et al., 2010), in which a fixed set of adjacent pixels were also  
147 sampled in every sampling cycle so that the total light exposure time for each pixel was reduced. The  
148 detailed design of the AOD two-photon scanner is described elsewhere (Lv et al., 2006). The light source  
149 was a Ti:Sapphire laser (MaiTai HP DS, Spectra-Physics), and 920 nm light was used for all two-photon  
150 recordings. The emitted fluorescence was routed via a dichroic mirror (FF665-Di02, Semrock) to the  
151 detector module, which was located adjacent to the filter cube to minimize the length of the light path.  
152 The detector module contained an IR-block filter (FF01-680/SP, Semrock) as well as a 562 nm dichroic  
153 mirror (FF562-Di02, Semrock) that separates shorter (green) and longer (red) wavelength light. The  
154 separated shorter and longer wavelengths of light were detected by a GaAsP photosensor module  
155 (H7422A-40, Hamamatsu) and a photomultiplier tube (R1924A, Hamamatsu), respectively. Full-frame  
156 scan recordings for functional imaging were made at 2.1 Hz for 15 s with a resolution of  $217 \times 217$  pixels.  
157 With the Olympus  $25\times/1.05$  NA objective lens that used in this study, the field of view was  $219 \times 219$   
158  $\mu\text{m}^2$ . For the high-speed random-access recordings, 15 sites were pre-determined on the basis of the odor-  
159 response data obtained during the frame scan recordings (see Fig. 2B). Although the system is capable of  
160 recording a larger number of sites (at a lower sampling rate), 15 was about the maximum number of cells  
161 with clear odor-evoked responses that could be identified from a given field of view. Therefore, all  
162 random-access recordings presented in this study were conducted with 15 sites, each of which covered a  
163 single neuron, at a sampling rate of 667 Hz for 15 s.

## 164 **Stimulus presentation**

165 Odor stimuli were presented via a custom-built olfactometer, which was described previously (Kikuta  
166 et al., 2013). Briefly, a mixture of odorous gas (diluted odorant bubbled with 100% nitrogen) at 100  
167 ml/min and carrier gas (filtered air) at 400 ml/min was continuously supplied but continuously vacuumed  
168 near the tip of the applicator. The vacuum was suspended with an electric command signal, resulting in  
169 the presentation of odorous gas until the vacuum resumed. In a test conducted with a photo-ionic odorant

170 sensor (mini PID model 200B, Aurora Scientific), the onset and offset of actual odorant delivery was  
171 delayed by approximately 100 ms relative to the timing of the command signals. The olfactometer was  
172 controlled by a custom-written program in LabVIEW (National Instruments; RRID:SCR\_014325) that  
173 enabled the stimulus presentation to be synchronized to the respiration cycle of the mouse. Four seconds  
174 after the onset of data acquisition, the command signal for an odor stimulus was sent at the peak of the  
175 first respiration signal (corresponding to the end of an inhalation cycle) so that the odorant did not reach  
176 the mouse in the middle of an inhalation. The duration of the stimulus was either 2 s or a single  
177 respiration cycle, in which case the command signal to terminate the odor stimulus was sent at the peak of  
178 the respiration signal in the immediately subsequent cycle.

179 For the odor stimuli, five single-molecule odorants that were aliphatic aldehydes with carbon chain  
180 lengths of three to seven (referred to as 3–7CHO, respectively) were used. All odorants were diluted  
181 1:100 with mineral oil and further flow-diluted 1:5 at the olfactometer. Therefore, the nominal final  
182 concentration of the odorants was 0.2%. Five odorants (3–7CHO) were presented in a block design, with  
183 each odorant presented once in a block of five trials. For mice 1–5, the odorant presentation order was the  
184 same in every block. For mice 6–8, the order was pseudo-randomized with the constraint that the same  
185 odorant was not presented in two sequential trials. In alternate blocks, the stimulus was presented for 2 s  
186 or for a single respiration cycle.

## 187 **Immunohistochemistry**

188 Mice were deeply anesthetized and fixed by transcardial perfusion with 4% paraformaldehyde in 0.1 M  
189 sodium phosphate buffer (pH 7.4). Then, brain samples were collected and post-fixed overnight at 4°C.  
190 The samples were cryoprotected in 30% sucrose (w/v) in PBS (pH 7.4) and embedded in optimal cutting  
191 temperature compound (Sakura Finteck). The olfactory tissues were cut on a cryostat into 20 µm sections  
192 (coronal) and stored at –20°C until use. The slices were pretreated in TBS-T (10 mM Tris-HCl (pH 7.4),  
193 100 mM NaCl with 0.3% Triton-X100 (v/v)) for 15 min and blocked with blocking buffer (5% normal  
194 donkey serum (v/v) in TBS-T) at 20–25°C for 1 h. The slices were then incubated with primary



195 antibodies diluted in blocking buffer overnight at 4°C. Sections were washed with TBS-T, then incubated  
196 with secondary antibodies for 1 h. The immunoreacted sections were washed and mounted with  
197 FLUORO-GEL mounting medium (Electron Microscopy Sciences, #17985-11).

198 The following antibodies were used. Primary antibodies: anti-GABA (MilliporeSigma, #A2052, rabbit,  
199 1:100) and anti-TH (MilliporeSigma, #AB152, rabbit, 1:500). Secondary antibody: Alexa Fluor 488  
200 donkey anti-rabbit IgG (Thermo Fisher Scientific, #A21206, 1:300).

201 Six to eight serial images were captured at intervals of 1.5  $\mu\text{m}$  with an Olympus FluoView FV1000  
202 laser scanning confocal microscope with a 20 $\times$  objective lens (UPLSAPO 20 $\times$ ), with or without 4 $\times$   
203 digital zoom. Then, the acquired images were converted to a Z-stack with the software FV10-ASW  
204 viewer (Olympus).

## 205 **Data analysis**

206 There were minor differences in the experimental conditions (e.g., the timing of the craniotomy and  
207 the order of stimulus presentation; see above) between the two subsets of mice (mice 1–5 versus mice 6–  
208 8). Since no difference was noticed between the data from these two subsets, they were not discriminated  
209 in any of the following analyses. All data analyses and preparation of figures were carried out in  
210 Fiji/ImageJ (Schindelin et al., 2012; RRID:SCR\_002285) and MATLAB (MathWorks,  
211 RRID:SCR\_001622) with custom scripts. In the recordings in this study, no prominent photobleaching of  
212 fluorescence was observed within a trial, and thus no correction for photobleaching was made unless  
213 explicitly described.

214 *Spatiotemporal activity maps.* For wide-field imaging, spatial patterns of odor-evoked activity were  
215 visualized as the difference between images from the pre-stimulus period and the response period (i.e.,  
216  $\Delta F/F_0$  maps; Fig. 2A). A baseline image from the pre-stimulus period was obtained by averaging the  
217 frames from 3 to 4 s after acquisition onset. Images for three different response periods (early, middle,  
218 and late) were obtained by averaging the frames in the 2 s time windows following 4.5, 6.5, or 8.5 s,

219 respectively, from the acquisition onset (0.5, 2.5, 4.5 s from the stimulus onset). In this specific analysis,  
220 the trial-by-trial jitter of inhalation onset or stimulus onset was not taken into account. Then, the pre-  
221 stimulus-period image was subtracted from each of three response-period images. The subtracted images  
222 were divided by a spatially filtered pre-stimulus-period image (two passes of a  $3 \times 3$  mean filter) for  
223 normalization. After the division, the resulting image was also filtered by two passes of a  $3 \times 3$  mean  
224 filter. Red, green, and blue color channels were assigned to the resulting images for the early, middle, and  
225 late response periods, respectively, and then all three channels were merged to form a full-color map.  
226 Therefore, the brightness of the resulting activity maps reflects the response amplitude and the hue  
227 reflects the character of the response time course. The intensity scale was set to the same value in each of  
228 the three color channels. Essentially the same procedure was applied to obtain the activity maps for two-  
229 photon full-frame imaging (Fig. 2B).

230 *Basic signal processing of the time-course data.* Data from two-photon random-access recordings are not  
231 a series of images, but a set of time series that resemble the data from multi-electrode recordings. Thus,  
232 no image processing is involved in the analysis. Time courses were converted to  $\Delta F/F_0$  by subtracting the  
233 averaged data from the first 1% of data points (150 ms;  $F_0$ ) and then dividing by  $F_0$ . A box filter with a  
234 100 ms window was applied to all the time courses unless specified.

235 *Response-based grouping of cells.* The subset of recorded cells that surrounded the same glomerulus had  
236 highly correlated odor selectivity (Figure 3). Under the assumption that these neurons were associated  
237 with the same glomerulus, such neurons were grouped using the following two criteria. First, the neurons  
238 were directly adjacent to the glomerulus of interest and no other glomerulus was located in between.  
239 Second, the response profile of a given neuron was closer to that of all the in-group recorded neurons than  
240 to that of any out-group recorded neurons. In other words, the least similar in-group neuron had a more-  
241 similar response profile than the most-similar out-group neuron. Cosine similarity (cosine of the angle  
242 between two vectors) was used as a measure of the similarity between two response profiles. A response  
243 profile here is defined as a vector representing the response amplitudes to the five different odors, or a

244 vector representing all pairwise differences (ten pairs from five odorants) of response amplitudes. When  
245 at least one of these two response profiles satisfied the above criteria, the neuron was considered as  
246 qualified. Response amplitudes were defined as the integral of the  $\Delta F/F_0$  trace (area under the trace) from  
247 the trials with single-respiration-cycle stimulation. In this analysis, since even tiny responses are  
248 potentially influential, photobleaching/drift was corrected for by subtracting a straight line that was best  
249 fitted to the 0–4 s (pre-stimulus period) and the 14–14.5 s period (post-response period) of the time course,  
250 only when the average of the latter period had a negative value. The correction was made only in the trials  
251 with downward changes because (1) prominent photobleaching/drift was observed only in the negative  
252 direction, and (2) applying correction to positive values would significantly distort the subset of data that  
253 showed long-lasting odor responses.

254 *Determining the onset latency and rise time of calcium transients.* The onset latency of an odor-evoked  
255 calcium transient was defined via the following procedure (see also a visual explanation in Fig. 5A). All  
256  $\Delta F/F_0$  traces were preprocessed with a 50 ms box filter. For a given trace, the baseline period was defined  
257 as a 100 ms time window immediately before the stimulus onset (the onset of the command signal). The  
258 baseline  $\Delta F/F_0$  level was determined as the mean value over the baseline period. To determine the noise  
259 level, the 4 s pre-stimulus period was divided into eight 0.5 s blocks, calculated the standard deviation  
260 within each block, and then selected the minimum among these. This procedure effectively eliminated the  
261 contribution of the occasional calcium transient (see Fig. 4A) on the noise level. The provisional onset  
262 latency was determined as the first time point in which 95% of the data points in the subsequent 100 ms  
263 exceeded the threshold (2.5 times the noise level). Then, the trace within the subsequent 100 ms time  
264 window was fitted to a straight line. The intersection of the fitted line and the baseline level was  
265 considered the onset of the calcium transient. The onset latency was defined as the duration from the  
266 onset of the first inhalation with the odor stimulus to the onset of the calcium transient. Although this  
267 procedure determined the onset time more accurately than simple threshold methods in high signal-to-  
268 noise (s/n) ratio data, it frequently resulted in obviously wrong values when the s/n ratio was lower.

269 Therefore, for this analysis, only data with a relatively high s/n ratio were considered. The s/n ratio was  
270 determined as the slope of the fitted line (in  $\Delta F/F_0$  per s) divided by the noise level defined above (in  
271  $\Delta F/F_0$ ). The threshold s/n ratio was determined empirically and set to 40 ( $s^{-1}$ ). In addition, in a small  
272 fraction of trials, the onset of odor-evoked calcium transients accidentally coincided with a “spontaneous”  
273 calcium transient. Such trials were discarded. The estimated onset latency was used for further analysis  
274 (presented in Figs. 5–7) when the latency was successfully estimated in three or more trials (out of 5–17  
275 trials) for a given cell–odor pair.

276 The rise time of an odor-evoked transient was defined as the duration between the time points when  
277 the signal reached 20% and 80% of the peak amplitude. For this analysis, all  $\Delta F/F_0$  traces were  
278 preprocessed with a 100 ms box filter. The baseline level was defined in the same way as the protocol for  
279 determining onset latency (see above). The peak amplitude was determined as the maximum value of the  
280 moving average of a 100 ms time window. Time points at 20% and 80% of the peak amplitude were  
281 defined as the earliest time point when half of the data points exceeded the threshold value in a 100 ms  
282 time window centered at the time point being considered.

283 To compare the onset latency and rise time between  $tdTomato^+$  and  $tdTomato^-$  neurons, taking into  
284 account their glomerular association, relative onset latency and relative rise time were used. Relative  
285 latency, for example, was defined for each group of cells putatively associated with the same glomerulus  
286 (including both  $tdTomato^+$  and  $tdTomato^-$  neurons). The relative latency ranged from zero (shortest) to  
287 one (longest), with equal spacing among neurons in the same group. For instance, if a group contained  
288 five neurons, their relative latencies would be 0, 0.25, 0.5, 0.75, and 1, from shortest to longest onset  
289 latency. If  $tdTomato^+$  neurons have shorter or longer onset latencies on average, the distribution of  
290 relative onset latencies would be different in  $tdTomato^+$  and  $tdTomato^-$  neurons. The same method was  
291 applied to rise times.

## 292 **Experiment design and statistical analyses**

293 Eight Gad2-tdTomato mice were used (seven males and one female (mouse 2); 12–32 weeks old at the  
294 time of recording). Imaging experiments were carried out in one bulb from each animal. The glomerulus-  
295 level analysis of onset latency (Fig. 6) includes data from 12 glomeruli in 7 mice. The glomerulus-level  
296 analysis of rise time (Fig. 8) includes data from 10 glomeruli in 6 mice. The comparisons between  
297 tdTomato<sup>+</sup> and tdTomato<sup>-</sup> neurons (Figs. 6 and 8B) were carried out on fewer cells and glomeruli, those  
298 that satisfied additional criteria (see Results).

299 Normality of the data is not assumed in the statistical tests. P-values less than 0.05 were considered  
300 statistically significant. The following is a list of the statistical tests used. Fig. 4D: Mann-Whitney U-test.  
301 Fig. 5B: Kruskal-Wallis test, for comparisons among glomerulus–odor pairs. Fig. 6: comparison with  
302 shuffled data (see below) for differences across glomerulus–odor pairs; Mann-Whitney U-test for the  
303 comparison of glomerulus-controlled relative onset latency (see the previous section) between tdTomato<sup>+</sup>  
304 and tdTomato<sup>-</sup> neurons. Fig. 7C: Wilcoxon signed-rank test. Fig. 8B: comparison with the shuffled data  
305 for differences across glomerulus–odor pairs. Mann-Whitney U-test for the comparison of glomerulus-  
306 controlled relative rise time between tdTomato<sup>+</sup> and tdTomato<sup>-</sup> neurons.

307 To statistically test whether the onset latency or rise time depended on the glomerulus–odor pairs  
308 (termed “groups” here) (Figs. 6 and 8B), the inter-quartile ranges (IQRs) of each group were compared  
309 with the corresponding values from shuffled data sets, according to the following procedure. First, the  
310 IQRs of onset latency or rise time were estimated for each group. The median IQR across all groups was  
311 chosen as the parameter to be tested. To shuffle the data, the association between the cell–odor pair and  
312 the group was randomly permuted, with maintaining the sizes of the groups (i.e., the number of neurons  
313 in each group). Shuffling was conducted for 100 000 runs, and the corresponding test parameter (median  
314 IQR of onset latency or rise time across groups) was calculated for each run. The P-value was defined as  
315 the percentage of shuffled runs in which the test parameter was smaller than that from the actual data.

316

## 317 **Results**

318 To analyze temporal coordination among JG cells in the glomerular network, we primarily focused on  
319 PG cells. PG cells are monoglomerular and are thus thought to receive little or no direct input from other  
320 glomeruli (Wachowiak and Shipley, 2006; Kiyokage et al., 2010). In addition, they are the most abundant  
321 cell type in the GL and can be genetically labeled. These traits make PG cells an excellent target for  
322 studying the coordination of odor-evoked activity in the glomeruli. Rather than selectively expressing the  
323 genetically encoded calcium indicator (GECI) GCaMP6f in PG cells, we genetically labeled PG cells with  
324 a red-fluorescent protein tdTomato and expressed GCaMP6f via an injected AAV vector under the pan-  
325 neuronal synapsin promoter. This labeling strategy allowed us to record from genetically identified PG  
326 cells as well as neighboring neurons of other types.

### 327 **Expression pattern of fluorescent proteins**

328 We used GAD2 (GAD65) as a molecular marker for a subset of PG cells (Kiyokage et al., 2010) in the  
329 GL, and genetically labeled this subset with a cre-dependent tdTomato reporter mouse (Madisen et al.,  
330 2010) that was crossed with a Gad2-IRES-Cre mouse (Taniguchi et al., 2011). First, we examined the  
331 expression pattern of tdTomato (Fig. 1). tdTomato expression was observed in the GL and all inner layers  
332 of the OB. We occasionally observed off-target tdTomato expression in a small subset of OSN axon  
333 bundles as well (data not shown). In the GL, while many JG-cell somata were labeled with tdTomato,  
334 fluorescence in the glomeruli was less prominent. Nearly all tdTomato<sup>+</sup> somata were also positive for  
335 GABA immunolabeling (Fig. 1A). A previous study reported that ~37% of JG cells were positive for  
336 GAD65, ~32% were positive for GAD67, and ~16% were positive for both GAD67 and GAD65 (Parrish-  
337 Aungst et al., 2007). Therefore, we expected to observe a significant proportion of GABA<sup>+</sup>/tdTomato<sup>-</sup>  
338 cells, corresponding to GAD67<sup>+</sup>/GAD65<sup>-</sup> cells, but this was not the case. We speculate that some of the  
339 GAD67<sup>+</sup>/GAD65<sup>-</sup> cells may have expressed Cre-recombinase (under the Gad2 promoter) earlier in the  
340 animal's life and thus expressed tdTomato. In this scenario, tdTomato<sup>+</sup> neurons would represent both  
341 GAD65<sup>+</sup> JG cells and a subset of GAD67<sup>+</sup>/GAD65<sup>-</sup> cells. This raises the possibility that sSA cells, a

342 separate class of JG cells positive for GAD67 (Kiyokage et al., 2010), were included in the tdTomato<sup>+</sup>  
343 cells. Therefore, we next examined the co-expression of tdTomato and tyrosine hydroxylase (TH), which  
344 is a marker of sSA cells in the OB (Kiyokage et al., 2010; Banerjee et al., 2015) (Fig. 1B). We found that  
345 TH<sup>+</sup> cells included both tdTomato<sup>+</sup> and tdTomato<sup>-</sup> subpopulations (see white and yellow arrowheads in  
346 Fig. 1B). This result is qualitatively consistent with the report that a subpopulation of TH<sup>+</sup> JG cells  
347 expresses GAD65 (Parrish-Aungst et al., 2007). In a previous study (Wachowiak et al., 2013), TH  
348 expression in JG cells was compared with GCaMP3 expression driven by the same mechanism as  
349 tdTomato in this study (a cre-dependent GCaMP3 reporter mouse crossed with the same Gad2-IRES-Cre  
350 driver mouse). They reported that 14% of TH<sup>+</sup> cells co-expressed GCaMP3, whereas the proportion of  
351 TH<sup>+</sup>/tdTomato<sup>+</sup> cells among TH<sup>+</sup> cells in this study appears higher, for unknown reasons. To summarize,  
352 tdTomato expression was specific to GABAergic neurons but may not be restricted to GAD65<sup>+</sup> neurons;  
353 thus we cannot rule out the possibility that a small proportion of tdTomato<sup>+</sup> cells might represent sSA  
354 cells. Because we did not detect any specific difference between tdTomato<sup>+</sup> and tdTomato<sup>-</sup> cells in the  
355 following analyses, we did not further characterize the identity of tdTomato<sup>+</sup> cells.

### 356 **Odor-evoked calcium transients in GCaMP-labeled glomeruli**

357 At the beginning of the recording session for each mouse, we checked the positions of glomeruli that  
358 were responsive to our stimulus set by recording the odor-evoked response in a large portion of the dorsal  
359 bulb with a high-speed CCD camera (Fig. 2A). Each panel in Fig. 2A2–4 is a combination of three  
360 activity maps that represent three different time windows (see Materials and Methods for detail). The  
361 early response (0.5–2.5 s after stimulus onset) is presented in red, the responses in subsequent time  
362 windows (2.5–4.5 and 4.5–6.5 s) are presented in green and blue, respectively, and the three maps are  
363 color-merged to produce the final image. Therefore, reddish colors imply dominance of the early response  
364 and whitish colors imply long-lasting responses, for example. Consistent with previous reports (Mori et  
365 al., 2006), strong activity was elicited by aliphatic aldehydes with different carbon chains. The central  
366 region of the dorsal OB in Fig. 2A shows many globular and spatially distinct centers of activity, which

367 each primarily represent the activity of an individual glomerulus. These glomeruli show relatively  
368 prolonged activity even after the odor stimulation (white or yellow regions). By contrast, the lateral side  
369 of the bulb (top of the images) shows activity that declines quickly after stimulus offset (red regions).  
370 There are also glomeruli that appear bluish in color (see Fig. 2A3), which represents a slow-rising  
371 calcium signal that peaked long after the stimulus offset. It is apparent that the time courses of odor-  
372 evoked calcium transients are diverse and depend on the particular glomerulus–odor pair. Of note,  
373 multiple cell types contributed to these signals from wide-field imaging because GCaMP6f was expressed  
374 under the control of the synapsin promoter. Therefore, the signals reflect not only the glomerular activity  
375 but also the activity of somata and other neuronal processes, including the inter-glomerular processes of  
376 sSA cells (Kiyokage et al., 2010) and processes in the inner layers.

### 377 **Odor-evoked calcium transients in GCaMP-labeled JG cells**

378 For two-photon recordings of individual JG cells, we chose the recording location guided by the data  
379 from wide-field imaging. Briefly, we first identified a candidate location where we found a cluster of  
380 several glomeruli, each of which responded to our stimulus set with a discriminable odor selectivity. At  
381 the location, we first conducted conventional XYT scans to assess the odor-evoked response of glomeruli  
382 and JG cells (Fig. 2B). On the basis of the shape and “color” of the activity maps, we could reliably match  
383 the glomeruli in the two-photon imaging with those in the wide-field imaging (Fig. 2). We kept the  
384 recording depth relatively shallow ( $45\text{--}98\ \mu\text{m}$ ,  $62.8 \pm 16.6\ \mu\text{m}$  mean  $\pm$  sd, from the dura mater) so that the  
385 glomeruli were included in the field of view. Since we needed to determine the recording sites (regions of  
386 interest; ROIs) for random-access scanning prior to the recording, we next picked 15 cells on the basis of  
387 the two-photon response maps (e.g., Fig. 2B) and the unprocessed two-photon microscope images (see  
388 also the Materials and Methods). Among 120 cells from 8 recordings, 79 were identified as tdTomato<sup>+</sup>  
389 ( $9.9 \pm 2.6$  per recording, mean  $\pm$  sd). The tdTomato<sup>-</sup> recorded cells may include GAD65<sup>-</sup> PG cells, sSA  
390 cells, and ET cells. ET cells, however, may be under-represented, considering that the AAV vector we  
391 used (AAV2/1) preferentially infects PG and/or sSA cells (Adam et al., 2014) and that the somata of ET



392 cells are located in the deeper part of the GL (Pinching and Powell, 1971; Macrides and Schneider, 1982;  
393 Hayar et al., 2004).

394 Examples of odor-evoked calcium transients are presented in Fig. 3A. Because the random-access  
395 recording method records data only from a set of pre-determined ROIs (see Figs. 3B and 4B), the  
396 obtained data is not a series of XY images but multiple traces from the ROIs (optical multi-ROI  
397 recording). Conventionally, odor-evoked responses are measured by presenting odors for several seconds  
398 (2 s in this study) as shown in Fig. 3A (left panel). The responses to a 2 s stimulus exhibited some  
399 diversity in their time courses. Whereas previous electrophysiological experiments demonstrated that  
400 odor-evoked responses of PG cells tend to occur as bursts of action potentials that are locked to the  
401 respiration cycle (Tan et al., 2010; Homma et al., 2013; Livneh et al., 2014), we observed respiration-  
402 locked modulation of calcium signals in only a minor subset of traces (data not shown). The typical time  
403 course of the odor-evoked calcium transients with 2 s stimulation was a monotonic rise followed by a  
404 monotonic decline, at various rates for each (Fig. 3A). However, the number of respiration cycles for the  
405 transients to reach the peak was heterogeneous. In some cases, the signal reached its peak amplitude  
406 during the first odor inhalation, while in other cases it took two or more inhalations to reach the peak.  
407 Although such heterogeneity in the response time course of JG cells is consistent with that observed in  
408 previous calcium-imaging studies (Wachowiak et al., 2013; Adam et al., 2014), this heterogeneity  
409 complicates the physiological implications of information extracted from the calcium signal (e.g., the  
410 peak amplitude). To obtain simpler and more comprehensible time courses, we used briefer stimuli that  
411 were controlled to the duration of a single respiration cycle (see Materials and Methods). The right panel  
412 of Fig. 3A shows examples of responses to such single-cycle stimuli. As expected, we observed more-  
413 stereotyped time courses with these stimuli than with multi-cycle (2 s) stimuli.

#### 414 **Response-based estimation of associated glomerulus**

415 JG cells that are associated with the same glomerulus show highly correlated stimulus selectivity (Tan  
416 et al., 2010; Kikuta et al., 2013), and are thought to be located in the proximity of the associated

417 glomerulus (Homma et al., 2013; Kikuta et al., 2013; Adam et al., 2014). We thus wondered if we could  
418 infer the association between the recorded cells and a particular glomerulus from their odor response and  
419 the location of the cell body. By comparing the odor-evoked responses to different odors, we observed  
420 that some of the recorded cells indeed showed highly correlated response profiles (Fig. 3C). To  
421 systematically compare the odor responses, we used the data from single-cycle stimulation trials and  
422 calculated the response amplitude, defined as the integral of each  $\Delta F/F_0$  trace (i.e., the area under the  
423 trace). The five-element response vectors (middle panel of Fig. 3C) that represent the response amplitudes  
424 to the five odors were often sufficient for comparison. However, we also considered the ten-element  
425 difference vectors that were composed of the differences between every pair of response amplitudes (right  
426 panel of Fig. 3C); these were useful to distinguish between the subsets of cells with relatively similar  
427 response vectors. Combining these data with the location of individual cells (Fig. 3B), we grouped  
428 together the cells that surrounded the same glomerulus and that showed highly correlated response  
429 profiles, and assumed that these neurons were associated with the same glomerulus (Fig. 3B2, C; see  
430 Materials and Methods for details). Note that only time-averaged data (area under the trace) were used for  
431 this glomerulus-assignment process. We deliberately avoided employing the temporal patterns of calcium  
432 transients during this process because we will discuss the dynamics of calcium transients with reference  
433 to these groups in the subsequent analyses. In the representative case shown in Fig. 3, we identified two  
434 groups of four cells each (shown in red and blue). We also found another group with two cells (shown in  
435 brown), although this group was not considered in the subsequent analyses because it contained too few  
436 cells. We were able to find 14 groups of three or more cells that satisfied the criteria in the eight fields of  
437 view from eight mice.

#### 438 **Baseline activity of the GCaMP-labeled JG cells**

439 Prior to a detailed analysis of the odor-evoked response, we briefly characterized the calcium signals  
440 in the pre-stimulus period and examined if they could potentially affect the analyses of the odor-evoked  
441 responses (Fig. 4). Fig. 4A represents examples of traces during the pre-stimulus period. Whereas

442 previous electrophysiological recordings reported that some JG cells exhibit action potentials that are  
443 coupled to the respiration cycle even without an odor stimulus (Homma et al., 2013, Livneh et al., 2014;  
444 Najac et al., 2015), we did not observe calcium signals that were regularly coupled to the respiration cycle  
445 in our cellular recordings despite a sufficiently high sampling rate. Possible explanations may include  
446 relatively few action potentials per cycle, relatively slow kinetics of either the GECI signal or intracellular  
447 calcium itself in the cell body, which may mask the respiration-locked modulation, or a combination of all  
448 of these. In contrast to the lack of respiration cycle-locked transients, we observed occasional fluctuations  
449 of the GCaMP signal that were absent or much less prominent in the simultaneously recorded red  
450 fluorescence from (calcium-insensitive) tdTomato. To compare the size of pre-stimulus fluctuations with  
451 the size of the odor-evoked response, we calculated the ratio of the peak amplitude of the odor-evoked  
452 response to the range (the difference between the 1st and 99th percentiles) of the pre-stimulus period  
453 signal (Fig. 4C). In the vast majority of cell–odor pairs ( $s/n > 1$  in 99.7% of the cell–odor pairs with odor-  
454 evoked responses), the odor-evoked response was much larger than the pre-stimulus fluctuation,  
455 suggesting that the pre-stimulus activity would not significantly affect the analysis of odor-evoked  
456 calcium transients.

457 We also noticed that signal fluctuations during the pre-stimulus period tend to be synchronized among  
458 the cells putatively associated with the same glomerulus (see previous section). This observation suggests  
459 that pre-stimulus activity is driven by some form of glomerular input or spontaneous local network  
460 activity within a glomerulus. To examine this possibility, we calculated the pairwise Pearson’s correlation  
461 coefficient between the time courses during the pre-stimulus period for all simultaneously recorded pairs  
462 of cells. The distribution of correlation coefficients is presented separately for the cells putatively from  
463 the same glomerulus and all other pairs (Fig. 4D). The correlation coefficients were significantly higher in  
464 the “same glomerulus” pairs than in the “all others” pairs ( $P = 2.4 \times 10^{-25}$ , Mann-Whitney U-test for the  
465 same distribution,  $N = 135$  and  $705$  pairs of cell–odor pairs for the “same glomerulus” and “all others”  
466 groups, respectively). This result suggests some degree of synchrony in the pre-stimulus activity among

467 the JG cells associated with the same glomerulus. There is a chance that the “all others” pairs may include  
468 some in which both cells were actually associated with the same glomerulus but that were mislabeled  
469 owing to our relatively conservative procedure for cell grouping.

#### 470 **Glomerulus-specific onset latencies of odor-evoked calcium transients**

471 Although it is difficult to infer the precise time course of bursts of action potentials from an odor-  
472 evoked calcium transient, it is more feasible to determine the onset latency of the transient, which reflects  
473 the onset of the burst. Therefore, we analyzed the onset latency of odor-evoked calcium (Figs. 5–7). First,  
474 we carefully determined the onset latency from our high-sampling-rate data (Fig. 5A; see Materials and  
475 Methods for details). Briefly, we approximate the earliest part of the rising signal as a linear line; the time  
476 of onset is defined as the time when this line intersects the baseline. The onset latency was defined as the  
477 difference between the time of onset and the onset of inhalation estimated from the respiration signal. Fig.  
478 5B presents onset latencies from cell–odor pairs in which onset latencies were successfully determined in  
479 at least five trials. Although the trial-by-trial deviation was relatively large, as shown by the IQR in Fig.  
480 5B, the median onset latency was not the same across cell–odor pairs ( $P = 1.8 \times 10^{-144}$ ,  $N = 165$  cell–odor  
481 pairs: Kruskal-Wallis test for non-uniform distribution). The distribution of onset latencies ranged from 0  
482 to 150 ms. Although we do not know precisely why the shortest onset latencies were so close to the onset  
483 of inhalation (0 ms), our speculation is that the respiration signals recorded from chest movements may  
484 lag behind the inhalation at the nose. If this is indeed the case, then every onset latency reported in this  
485 study is underestimated by a certain amount.

486 The causes of heterogeneity in onset latency may include (1) heterogeneous inputs to different  
487 glomeruli, (2) differential interactions with the glomerular circuits, or (3) differences in cell type. Since  
488 the majority of our recorded cells were PG cells, differences in cell type are unlikely to explain all of the  
489 heterogeneity. If heterogeneous inputs to different glomeruli are the primary cause, the deviation in onset  
490 latency should be much smaller among the JG cells associated with the same glomerulus. Therefore, we  
491 examined onset latencies in the groups of cell–odor pairs putatively associated with the same glomerulus

492 to compare the onset latencies within and across glomeruli (Fig. 6). The median onset latencies of cell–  
493 odor pairs putatively associated with the same glomerulus were distributed in relatively narrow time  
494 windows compared with the distribution as a whole, suggesting that onset latency is primarily dependent  
495 on the glomerulus ( $P = 2.2 \times 10^{-4}$ , comparison of in-group IQR with shuffled data). There were cases in  
496 which different odors resulted in discriminable onset latencies for cells within the same glomerulus (e.g.,  
497 mouse 2 and mouse 4 in Fig. 6), implying that the onset latency depends on both the glomerulus and the  
498 odor presented. This result also rules out the possibility that the differences in onset latency are an artifact  
499 caused by the measurement error in inhalation onset.

500 Given that the glomerulus–odor pair was the primary determinant of onset latency, we compared onset  
501 latencies between tdTomato<sup>+</sup> and tdTomato<sup>-</sup> cells to examine the possible contribution of cell type to the  
502 onset latency. When we examined the relative order of onset latency within a glomerulus–odor pair (see  
503 Materials and Methods), we did not see any differences with regard to tdTomato expression ( $P = 0.39$ ,  $N$   
504 = 41 tdTomato<sup>+</sup> and 26 tdTomato<sup>-</sup> cell–odor pairs: Mann-Whitney U-test).

### 505 **Onset latencies of JG cells with the same odor-response profile**

506 To gain insight into the possible role of glomerular circuits in onset latency, we next compared the  
507 onset latency among cells within the same glomerulus–odor pair (Fig. 7). The first observation that drew  
508 our attention was that the trial-by-trial deviation of each cell (summarized as the IQR) was larger than the  
509 deviation of median onset latencies across cells (Figs. 6 and 7A1–2). To understand the origin of this  
510 deviation, we re-organized the data and sorted them by trial (Fig. 7A3–4). We found that the deviation of  
511 medians across trials was much larger than the deviation of medians across cells, suggesting that the large  
512 intracell deviations are caused by the deviation across trials, which might be related, for example, to a  
513 fluctuating state in the animal or to measurement error in the inhalation onset. Of note, we did not find a  
514 clear relationship between the median onset latency within the trial and the order of acquisition (data not  
515 shown). As presented in Fig. 7C, the IQR across trials was larger than the IQR across cells for most of the  
516 glomerulus–odor pairs ( $P = 2.2 \times 10^{-4}$ ,  $N = 20$ : Wilcoxon’s signed-rank test). Therefore, when the onset

517 latencies were aligned to the median of the corresponding trial, the deviation of each cell across trials  
518 substantially decreased (Fig. 7B). In the case presented in Fig. 7B, the order of the aligned onset latencies  
519 was well preserved between the two stimuli (note that the same color represents the same cell). Although  
520 this may imply the presence of a systematic difference in onset latency among these cells, examining this  
521 further would require a larger data set than we currently have, with multiple stimuli and more cells.

## 522 **Distribution of the rise time in single-cycle stimulation**

523 In addition to onset latency, an odor-evoked burst of action potentials can be characterized by, for  
524 example, the duration and the number of spikes. With the assumption that the duration of the rising phase  
525 of a calcium transient (rise time) is closely correlated with the duration of burst activity, we analyzed the  
526 rise time of odor-evoked calcium transients (Fig. 8). We defined the rise time as the duration for a  
527 calcium signal to rise from 20% to 80% of the peak amplitude. Because we could not distinguish  
528 individual respiration cycles in the calcium transients evoked by multi-cycle stimulation, we focused  
529 primarily on data from single-cycle stimulation.

530 First, we simply looked at the distribution of rise times across odor–cell pairs (Fig. 8A). As expected,  
531 the large majority (84.8%) of rise times for single-cycle stimulation (blue) were shorter than 300 ms,  
532 suggesting that the action potentials halted (or greatly decreased) within a single respiration cycle.  
533 (Typical breathing rates during the recordings were 120–200 cycles/min, or 300–500 ms/cycle.) The  
534 presence of relatively short rise times may indicate spike activity of shorter duration in these cells. A  
535 minor proportion had longer rise times, likely reflecting the persistence of activity even after the stimulus  
536 offset. By contrast, the rise times under 2 s stimulation (gray) were distributed more broadly, reflecting  
537 the heterogeneous time courses of calcium transients in this condition (Fig. 3A). Next, as for onset latency  
538 (Fig. 6), we grouped the data from cell–odor pairs putatively associated with the same glomerulus, to  
539 examine the contribution of glomerular inputs (Fig. 8B). With single-cycle stimulation, rise times  
540 depended on the glomerulus–odor pair with statistical significance ( $P < 10^{-5}$ , comparison with shuffled  
541 data, 62 cell–odor pairs from 12 glomerulus–odor pairs with 4 or more neurons). This was not the case for

542 the multi-cycle stimulation ( $P = 0.12$ ). In Fig. 8B, the IQRs for each cell–odor pair (horizontal bars) were  
543 not very different from the deviation among median rise times within the same group. This was in clear  
544 contrast with the results for onset latency (Figs. 6 and 7A) and suggests little trial-by-trial deviation (see  
545 above).

546 As for onset latency, above, we compared the relative rise times of tdTomato<sup>+</sup> and tdTomato<sup>-</sup> neurons  
547 putatively associated with the same glomerulus and did not see any statistically significant differences ( $P$   
548 = 0.28 for single-cycle stimulation,  $P = 0.39$  for multi-cycle stimulation,  $N = 30$  tdTomato<sup>+</sup> and 14  
549 tdTomato<sup>-</sup> cell–odor pairs from eight glomerulus–odor pairs that included four or more neurons: Mann-  
550 Whitney U-test). Finally, we examined the correlation between transient rise times and peak amplitudes,  
551 as a strong correlation between these would not be compatible with our assumption that rise time reflects  
552 the duration of burst activity. We only considered data from single-cycle stimulation in this analysis.  
553 Since we cannot compare response amplitudes across different cells, we analyzed cells that were activated  
554 by more than one odorant. For each cell, all rise times and response amplitudes were normalized to those  
555 of the response with the largest peak amplitude (the reference response), and plotted in Fig. 8C (reference  
556 responses are omitted but would appear at [0, 1] on the plot). Among 77 cell–odor pairs, the onset latency  
557 was shorter in 34 cell–odor pairs and longer in 43 cell–odor pairs than the corresponding reference  
558 response. Thus, it is highly unlikely that rise time is accounted for solely by the response amplitude,  
559 which favors our assumption that rise time is correlated with the duration of burst activity.

560

## 561 **Discussion**

562 In this study, we recorded odor-evoked calcium transients from individual JG cells in anesthetized  
563 free-breathing mice at an extremely high sampling rate and measured the onset latency and rise time of  
564 the transients. We examined these properties in sets of JG cells putatively associated with the same  
565 glomerulus (“homoglomerular” JG cells). While the onset latency of JG cells spans ~150 ms when

566 glomerular association is not taken into account, the range of onset latencies is substantially smaller  
567 (typically a few tens of milliseconds) among homglomerular JG cells. Similar glomerulus specificity  
568 was also found for rise times when we presented a brief odor stimulus. These observations suggest that  
569 the glomeruli (more strictly, the glomerulus–odor pairs) determine a significant portion of the response  
570 time course in JG cells.

### 571 *High-speed calcium recording by random-access scanning*

572 Here, we briefly discuss the technical aspects of this study. The intracellular calcium level has become  
573 a popular proxy for neuronal activity (Grienberger and Konnerth, 2012). It is well acknowledged that the  
574 calcium signal is much slower than the related action potentials, but this has not been a serious issue in  
575 two-photon imaging studies partly owing to the low frame rates of conventional two-photon microscopes.  
576 At the same time, such a situation has limited the analyses possible from readouts of the temporal patterns  
577 of calcium signals *in vivo*. In this study, we used a random-access scanning technique (Iyer et al., 2006;  
578 Grewe et al., 2010) and sampled the calcium transients at a high rate (667 Hz). This high sampling rate  
579 was achieved by limiting the number of pixels sampled. Thus, the sampling duration *per pixel*, which  
580 often limits the s/n ratio of two-photon recording, was no different from the full-frame scan. While  
581 random-access scanning has tended to be utilized more for volumetric recordings of numerous cells  
582 (Göbel et al., 2007; Froudarakis et al., 2014), high-fidelity recording is another powerful application of  
583 the technique (Grewe et al., 2010). Technically, our scanner is capable of scanning at *per-pixel* sampling  
584 rates up to ~10 times higher than in this study (with lower s/n ratio). Thus, this technique is compatible  
585 with two-photon voltage recording of action potentials with voltage-sensitive fluorescence proteins,  
586 which have been continuously improving in efficacy (Lin and Schnitzer, 2016; Chamberland et al., 2017).

### 587 *Heterogeneity in the dynamics of odor-evoked calcium transients*

588 In experiments with anesthetized free-breathing animals, it is common practice to present an odor  
589 stimulus for several seconds, lasting over multiple respiration cycles. In our recording of odor-evoked



590 calcium transients in the GCaMP6f-expressing JG cells (dominated by PG cells), it took a different  
591 number of respiration cycles to reach the transient peak in different cells (or cell–odor pairs); this is also  
592 illustrated by the heterogeneity in rise times (the period from 20% to 80% of the peak signal amplitude;  
593 Fig. 8A, B). It is not clear to what extent this heterogeneity is due to the spike–calcium relationship  
594 (Grienberger and Konnerth, 2012) or to the temporal pattern of the spikes. The phenomenon may  
595 potentially be understood better by inferring the action potentials from the calcium signals (Yaksi and  
596 Friedrich, 2006; Theis et al., 2016; Rahmati et al., 2018). In this study, we did not take this path because  
597 of our lack of easy means to validate the inference. It is indeed an interesting question whether such  
598 methods could successfully reconstruct the action potentials in this case: reconstruction may be  
599 challenging in PG cells owing to the respiration-coupled bursting activity that may make the spike–  
600 calcium relationship strongly non-linear.

601 Such heterogeneous time courses also raise a practical problem for quantifying the amplitude of  
602 calcium transients. For example, peak amplitude is often used to quantify the amplitude of transients, but  
603 it may be associated with different numbers of respiration cycles across cells. Note that this issue is also  
604 relevant to the analysis of rise time. In this study, we used single-respiration-cycle stimuli to prevent  
605 signals from accumulating over multiple respiration cycles for analyses involving comparisons of the  
606 response amplitude (Figs. 3 and 8C). Although we do not have enough data to address whether the  
607 problem is also relevant to other types of neurons in the olfactory system, diverse calcium-transient time  
608 courses have been reported in multiple cell types (Wachowiak et al., 2013). Thus, there may be other  
609 cases where the shape of the calcium transients deserves consideration during the quantification of  
610 response properties.

#### 611 *Glomerular circuits and glomerulus-specific onset latency*

612 The glomerulus-specific onset latencies of JG cells are characterized by relatively small deviations in  
613 onset latency within the same glomerulus and larger deviations across glomeruli. The most plausible  
614 explanation for this is that the JG cells follow the onset of sensory inputs in each glomerulus, as the onset

615 latency of sensory inputs from OSNs is heterogeneous across glomeruli (Spors et al., 2006; Carey et al.,  
616 2009). On the other hand, the small deviations within a glomerulus may imply that the sensory inputs  
617 from many OSNs are accumulated in such a time window, given that an axon from each OSN covers a  
618 small fraction of a glomerulus (Hálasz and Greer, 1993). It is worth noting that most of our analyses were  
619 limited to relatively strong responses as we only used data with a high s/n ratio. It is thus an interesting  
620 question whether a weaker stimulus would broaden the distribution of onset latencies among  
621 homglomerular JG cells. If this was indeed the case, such a mechanism could play an important role in  
622 the intraglomerular circuit, where many JG cells of the same type (or subtype) receive homogeneous  
623 inputs and perform the same function (e.g., feedforward excitation/inhibition). For instance, even if a  
624 class of JG cells collectively releases the same total amount of neurotransmitter to the glomerular circuit,  
625 the consequences would be different if highly synchronized neurons release the transmitter at a high  
626 density over a short time window, versus if less-synchronized neurons release the transmitter at a lower  
627 density over a longer time window.

#### 628 *Implications for the function of the OB and glomeruli*

629 Although our recordings were limited to JG cells, the glomerulus-specific response time course of  
630 these cells suggests that the time course of sensory inputs is highly glomerulus-specific. Each glomerulus  
631 was driven at a different time, with a strong input in the first tens of milliseconds. The temporal pattern of  
632 odor-evoked activity has been shown to be a part of stimulus representation in the principal neurons (Cury  
633 and Uchida, 2010; Uchida et al., 2014). Our results support the idea that sensory inputs play a role in the  
634 temporal coding of odor stimuli (Schaefer and Margrie, 2007; Raman et al., 2010). For example, a coarse  
635 temporal pattern may be determined by the sensory inputs (as well as the glomerular circuits) and be  
636 largely homogeneous among homglomerular mitral cells. The odor-evoked activity, including the  
637 temporal pattern, may then be refined in subsequent OB circuits so that it is diversified among individual  
638 principal neurons (Dhawale et al., 2010; Kikuta et al., 2013). Furthermore, glomerulus-specific onset  
639 latencies may play a role in the horizontal connections among glomeruli (Aungst et al., 2003; Kiyokage et

640 al., 2010; Banerjee et al., 2015). Early responding glomeruli may be capable of modulating the activity in  
641 neighboring glomeruli more strongly, although the computational advantage of such a mechanism is not  
642 obvious in a system that supposedly lacks a topographic representation of stimulus space (Cleland and  
643 Sethupathy, 2006; Cleland, 2014).

644

645

646 **References**

- 647 Adam Y, Livneh Y, Miyamichi K, Groysman M, Luo L, Mizrahi A (2014) Functional transformations of  
648 odor inputs in the mouse olfactory bulb. *Front Neural Circuits* 8:129.
- 649 Aungst JL, Heyward PM, Puche AC, Karnup S V, Hayar A, Szabo G, Shipley MT (2003) Centre-  
650 surround inhibition among olfactory bulb glomeruli. *Nature* 426:623–629.
- 651 Banerjee A, Marbach F, Anselmi F, Koh MS, Davis MB, Garcia da Silva P, Delevich K, Oyibo HK,  
652 Gupta P, Li B, Albeanu DF (2015) An Interglomerular Circuit Gates Glomerular Output and  
653 Implements Gain Control in the Mouse Olfactory Bulb. *Neuron* 87:193–207.
- 654 Burton SD (2017) Inhibitory circuits of the mammalian main olfactory bulb. *J Neurophysiol* 118:2034–  
655 2051.
- 656 Carey RM, Sherwood WE, Shipley MT, Borisyuk A, Wachowiak M (2015) Role of intraglomerular  
657 circuits in shaping temporally structured responses to naturalistic inhalation-driven sensory input to  
658 the olfactory bulb. *J Neurophysiol* 113:3112–3129.
- 659 Carey RM, Verhagen J V, Wesson DW, Pérez N, Wachowiak M (2009) Temporal structure of receptor  
660 neuron input to the olfactory bulb imaged in behaving rats. *J Neurophysiol* 101:1073–1088.
- 661 Chamberland S, Yang HH, Pan MM, Evans SW, Guan S, Chavarha M, Yang Y, Salesse C, Wu H, Wu JC,  
662 Clandinin TR, Toth K, Lin MZ, St-Pierre F (2017) Fast two-photon imaging of subcellular voltage  
663 dynamics in neuronal tissue with genetically encoded indicators. *Elife* 6:e25690.
- 664 Cleland TA (2014) Construction of odor representations by olfactory bulb microcircuits. *Prog Brain Res*  
665 208:177–203.
- 666 Cleland T, Sethupathy P (2006) Non-topographical contrast enhancement in the olfactory bulb. *BMC*  
667 *Neurosci* 7:7.

- 668 Cury KM, Uchida N (2010) Robust odor coding via inhalation-coupled transient activity in the  
669 mammalian olfactory bulb. *Neuron* 68:570–585.
- 670 De Saint Jan D, Hirnet D, Westbrook GL, Charpak S (2009) External tufted cells drive the output of  
671 olfactory bulb glomeruli. *J Neurosci* 29:2043–2052.
- 672 Dhawale AK, Hagiwara A, Bhalla US, Murthy VN, Albeanu DF (2010) Non-redundant odor coding by  
673 sister mitral cells revealed by light addressable glomeruli in the mouse. *Nat Neurosci* 13:1404–1412.
- 674 Froudarakis E, Berens P, Ecker AS, Cotton RJ, Sinz FH, Yatsenko D, Saggau P, Bethge M, Tolias AS  
675 (2014) Population code in mouse V1 facilitates readout of natural scenes through increased  
676 sparseness. *Nat Neurosci* 17:851–857.
- 677 Fukunaga I, Herb JT, Kollo M, Boyden ES, Schaefer AT (2014) Independent control of gamma and theta  
678 activity by distinct interneuron networks in the olfactory bulb. *Nat Neurosci* 17:1208–1216.
- 679 Geramita M, Urban NN (2017) Differences in Glomerular-Layer-Mediated Feedforward Inhibition onto  
680 Mitral and Tufted Cells Lead to Distinct Modes of Intensity Coding. *J Neurosci* 37:1428–1438.
- 681 Göbel W, Kampa BM, Helmchen F (2007) Imaging cellular network dynamics in three dimensions using  
682 fast 3D laser scanning. *Nat Methods* 4:73–79.
- 683 Grewe BF, Langer D, Kasper H, Kampa BM, Helmchen F (2010) High-speed in vivo calcium imaging  
684 reveals neuronal network activity with near-millisecond precision. *Nat Methods* 7:399–405.
- 685 Grienberger C, Konnerth A (2012) Imaging Calcium in Neurons. *Neuron* 73:862–885.
- 686 Hálasz N, Greer CA (1993) Terminal arborizations of olfactory nerve fibers in the glomeruli of the  
687 olfactory bulb. *J Comp Neurol* 337:307–316.

- 688 Hayar A, Karnup S, Shipley MT, Ennis M (2004) Olfactory bulb glomeruli: external tufted cells  
689 intrinsically burst at theta frequency and are entrained by patterned olfactory input. *J Neurosci*  
690 24:1190–1199.
- 691 Homma R, Kovalchuk Y, Konnerth A, Cohen LB, Garaschuk O (2013) In vivo functional properties of  
692 juxtglomerular neurons in the mouse olfactory bulb. *Front Neural Circuits* 7:23.
- 693 Iyer V, Hoogland TM, Saggau P (2006) Fast functional imaging of single neurons using random-access  
694 multiphoton (RAMP) microscopy. *J Neurophysiol* 95:535–545.
- 695 Kikuta S, Fletcher ML, Homma R, Yamasoba T, Nagayama S (2013) Odorant Response Properties of  
696 Individual Neurons in an Olfactory Glomerular Module. *Neuron* 77:1122–1135.
- 697 Kiyokage E, Pan Y-Z, Shao Z, Kobayashi K, Szabo G, Yanagawa Y, Obata K, Okano H, Toida K, Puche  
698 AC, Shipley MT (2010) Molecular identity of periglomerular and short axon cells. *J Neurosci*  
699 30:1185–1196.
- 700 Kosaka T, Kosaka K (2014) Olfactory Bulb Anatomy. *Ref Modul Biomed Sci* doi:10.1016/B978-0-12-  
701 801238-3.04705-X.
- 702 Kosaka T, Kosaka K (2016) Neuronal organization of the main olfactory bulb revisited. *Anat Sci Int*  
703 91:115–127.
- 704 Lin MZ, Schnitzer MJ (2016) Genetically encoded indicators of neuronal activity. *Nat Neurosci* 19:1142–  
705 1153.
- 706 Livneh Y, Adam Y, Mizrahi A (2014) Odor Processing by Adult-Born Neurons. *Neuron* 81:1097–1110.
- 707 Lv X, Zhan C, Zeng S, Chen WR, Luo Q (2006) Construction of multiphoton laser scanning microscope  
708 based on dual-axis acousto-optic deflector. *Rev Sci Instrum* 77:046101.

- 709 Macrides F, Schneider SP (1982) Laminar organization of mitral and tufted cells in the main olfactory  
710 bulb of the adult hamster. *J Comp Neurol* 208:419–430.
- 711 Madisen L, Zwingman TA, Sunkin SM, Oh SW, Zariwala HA, Gu H, Ng LL, Palmiter RD, Hawrylycz  
712 MJ, Jones AR, Lein ES, Zeng H (2010) A robust and high-throughput Cre reporting and  
713 characterization system for the whole mouse brain. *Nat Neurosci* 13:133–140.
- 714 Mori K, Takahashi YK, Igarashi KM, Yamaguchi M (2006) Maps of Odorant Molecular Features in the  
715 Mammalian Olfactory Bulb. *Physiol Rev* 86:409–433.
- 716 Nagayama S, Homma R, Imamura F (2014) Neuronal organization of olfactory bulb circuits. *Front*  
717 *Neural Circuits* 8:98.
- 718 Najac M, De Saint Jan D, Reguero L, Grandes P, Charpak S (2011) Monosynaptic and polysynaptic feed-  
719 forward inputs to mitral cells from olfactory sensory neurons. *J Neurosci* 31:8722–8729.
- 720 Najac M, Sanz Diez A, Kumar A, Benito N, Charpak S, De Saint Jan D (2015) Intraglomerular Lateral  
721 Inhibition Promotes Spike Timing Variability in Principal Neurons of the Olfactory Bulb. *J Neurosci*  
722 35:4319–4331.
- 723 Parrish-Aungst S, Shipley MT, Erdelyi F, Szabo G, Puche AC (2007) Quantitative analysis of neuronal  
724 diversity in the mouse olfactory bulb. *J Comp Neurol* 501:825–836.
- 725 Pinching AJ, Powell TP (1971) The neuron types of the glomerular layer of the olfactory bulb. *J Cell Sci*  
726 9:305–345.
- 727 Rahmati V, Kirmse K, Holthoff K, Kiebel SJ (2018) Ultra-fast accurate reconstruction of spiking activity  
728 from calcium imaging data. *J Neurophysiol* 119:1863–1878.
- 729 Raman B, Joseph J, Tang J, Stopfer M (2010) Temporally diverse firing patterns in olfactory receptor  
730 neurons underlie spatiotemporal neural codes for odors. *J Neurosci* 30:1994–2006.

- 731 Schaefer AT, Margrie TW (2007) Spatiotemporal representations in the olfactory system. Trends  
732 Neurosci 30:92–100.
- 733 Schindelin J, Arganda-Carreras I, Frise E, Kaynig V, Longair M, Pietzsch T, Preibisch S, Rueden C,  
734 Saalfeld S, Schmid B, Tinevez J-Y, White DJ, Hartenstein V, Eliceiri K, Tomancak P, Cardona A  
735 (2012) Fiji: an open-source platform for biological-image analysis. Nat Methods 9:676–682.
- 736 Shao Z, Puche AC, Liu S, Shipley MT (2012) Intraglomerular inhibition Shapes the Strength and  
737 Temporal Structure of Glomerular Output. J Neurophysiol 108:782–793.
- 738 Spors H, Wachowiak M, Cohen LB, Friedrich RW (2006) Temporal dynamics and latency patterns of  
739 receptor neuron input to the olfactory bulb. J Neurosci 26:1247–1259.
- 740 Tan J, Savigner A, Ma M, Luo M (2010) Odor information processing by the olfactory bulb analyzed in  
741 gene-targeted mice. Neuron 65:912–926.
- 742 Taniguchi H, He M, Wu P, Kim S, Paik R, Sugino K, Kvitsani D, Fu Y, Lu J, Lin Y, Miyoshi G, Shima Y,  
743 Fishell G, Nelson SB, Huang ZJ (2011) A Resource of Cre Driver Lines for Genetic Targeting of  
744 GABAergic Neurons in Cerebral Cortex. Neuron 71:995–1013.
- 745 Theis L, Berens P, Froudarakis E, Reimer J, Román Rosón M, Baden T, Euler T, Tolias AS, Bethge M  
746 (2016) Benchmarking Spike Rate Inference in Population Calcium Imaging. Neuron 90:471–482.
- 747 Uchida N, Poo C, Haddad R (2014) Coding and Transformations in the Olfactory System. Annu Rev  
748 Neurosci 37:363–385.
- 749 Wachowiak M, Economo MN, Diaz-Quesada M, Brunert D, Wesson DW, White JA, Rothermel M  
750 (2013) Optical Dissection of Odor Information Processing In Vivo Using GCaMPs Expressed in  
751 Specified Cell Types of the Olfactory Bulb. J Neurosci 33:5285–5300.
- 752 Wachowiak M, Shipley MT (2006) Coding and synaptic processing of sensory information in the  
753 glomerular layer of the olfactory bulb. Semin Cell Dev Biol 17:411–423.



- 754 Wellis DP, Scott JW (1990) Intracellular responses of identified rat olfactory bulb interneurons to  
755 electrical and odor stimulation. *J Neurophysiol* 64:932–947.
- 756 Yaksi E, Friedrich RW (2006) Reconstruction of firing rate changes across neuronal populations by  
757 temporally deconvolved Ca<sup>2+</sup> imaging. *Nat Methods* 3:377–383.
- 758

759 **Figure Legends**

760

761 Figure 1. Expression patterns of tdTomato.

762 The progeny of Gad2-IRES-Cre and cre-dependent tdTomato reporter mice were used in this study. A1–3.

763 Spatial pattern of immunolabeled GABA (A1), tdTomato (A2), and the merged image (A3). The region

764 indicated by a white box in the top panels is presented at a higher magnification in the corresponding

765 bottom panels. B1–3. Spatial pattern of immunolabeled TH (B1), tdTomato (B2), and the merged image

766 (B3). White and yellow arrowheads indicate examples of TH<sup>+</sup>/tdTomato<sup>+</sup> cells and TH<sup>+</sup>/tdTomato<sup>-</sup> cells,

767 respectively. Approximate positions of layer boundaries are indicated by black dotted lines in the space

768 between the panels A3 and B1. Scale bars: 50  $\mu\text{m}$ .

769

770 Figure 2. Activity ( $\Delta F/F_0$ ) maps color-coded by the phase of response in wide-field and two-photon

771 imaging.

772 A1. Surface image for wide-field (single-photon) imaging. Scale bar: 500  $\mu\text{m}$ . A2–4. Maps of odor-

773 evoked response to 4CHO, 5CHO, and 6CHO, respectively. Each map is a synthesis of red, green, and

774 blue maps that represent the periods 0.5–2.5, 2.5–4.5, and 4.5–6.5 s after stimulus onset, respectively. B1.

775 A two-photon image of the selected area, indicated by the black box in A1 and by white corners in A2–4.

776 Scale bar: 50  $\mu\text{m}$ . B2–4. Maps of odor-evoked response, with the colors representing the same periods as

777 in A2–4.

778

779 Figure 3. Odor-evoked calcium transients and grouping of JG cells by response profile.

780 A. An example data set from a single trial of random-access scanning of 15 ROIs (cells). Left traces are

781 responses to a 2 s odor stimulus, and right traces are responses to a single-respiration-cycle stimulus. The

782 bottom black traces show the respiration signal. Gray horizontal bars above the respiration signals  
783 indicate the timing of valve opening for odor presentation. Note that actual odor presentation lags  
784 approximately 0.1 s behind the valve opening. The ordering of the ROIs is intentional, based on the result  
785 of grouping shown in C. B. Two-photon image of the recording site (B1) and the ROI indexes (B2). Dots  
786 and contours represent the ROIs and glomeruli, respectively. Non-white colors of dots and contours in B2  
787 indicate the groups presented in C. Scale bar: 50  $\mu\text{m}$ . C. Odor-evoked responses of the same ROIs to five  
788 odors (single-cycle stimulus). The left block shows the response time courses. The middle block shows  
789 the areas under the time courses as bar charts. The right block shows the difference in areas between  
790 every possible pair of odors. Colored vertical lines at the right indicate the groups of cells putatively  
791 associated with the same glomerulus (see text for details). Scale bars: 3 s (horizontal), 100%  $\Delta F/F_0$   
792 (vertical).

793

794 Figure 4. Characterization of calcium signals in the pre-stimulus period.

795 A. An example data set from the pre-stimulus period in a trial. Green traces are the signal from the green  
796 channel (GCaMP6f), and magenta traces are the signal from the red channel (tdTomato). Apparent odor-  
797 evoked changes in some of the magenta traces (e.g., ROI 10) suggest a minor contribution of the GCaMP  
798 signal to the red channel. The relative contribution from the GCaMP signal may vary depending on the  
799 relative expression levels of GCaMP and tdTomato at an individual ROI. B. Two-photon image of the  
800 recording site with ROIs and their indexes. Scale bar: 50  $\mu\text{m}$ . C. Stacked histogram of the ratio between  
801 peak response amplitude and range (the distance between the 1st and 99th percentiles) in the pre-stimulus  
802 period. Note the logarithmic scale on the x-axis. The response is much larger than the fluctuations in the  
803 pre-stimulus period in the vast majority of cases. D. Histograms showing the distribution of pairwise  
804 correlation coefficients for the time courses of activity during the pre-stimulus period. Upper and lower  
805 histograms show data from cell pairs putatively associated with the same glomerulus and pairs from  
806 different glomeruli, respectively.

807

808 Figure 5. Onset latencies of odor-evoked calcium transients are heterogeneous across JG cells.

809 A. Graphic representation of the definition of onset latency. (a) Baseline, defined as the mean of the pre-  
810 stimulus period signal. (b) Threshold, defined as 2.5 times the standard deviation of the pre-stimulus  
811 period signal. (c) Time point at which the signal exceeds the threshold. (d) Time window of the first 100  
812 ms above the threshold. (e) Regression line of the signal in the 100 ms time window. (f) Point where the  
813 regression line crosses the baseline. This time point is considered the onset of the calcium transient. (g)  
814 Onset of the first inhalation with the odor stimulus. (h) Onset latency, defined as the distance between the  
815 onset of inhalation and the onset of the calcium transient. B. Distribution of onset latencies. Each row  
816 represents a single cell–odor pair as a box-and-whisker plot (see inset). Cell–odor pairs are arranged  
817 according to median onset latency for clarity (83 cell–odor pairs from 8 recording sites, out of all 165  
818 pairs, are presented). Each box-and-whisker plot represents data from 5–17 trials. C. Histogram showing  
819 the distribution of medians shown in B.

820

821 Figure 6. JG-cell onset latency strongly depends on the putative glomerular association.

822 A subset of the box-and-whisker plot from Fig. 5 is presented, rearranged according to glomerulus–odor  
823 pairs. Different glomeruli are presented in different colors. In some of the glomeruli, data from more than  
824 one odorant were available. Dots in the box-and-whisker plots represent the median, and expression of the  
825 GAD2 marker tdTomato is indicated by the dot color (red for tdTomato<sup>+</sup> and black for tdTomato<sup>-</sup>).  
826 Mouse and glomerulus identity are at the left. Odorant is indicated at the right.

827

828 Figure 7. Detailed analysis of onset latency across cells putatively associated with the same glomerulus.

829 The onset latencies of cell–odor pairs from a glomerulus in mouse 4 (see Fig. 6) are presented with an  
830 alternative visualization. A1–2. Reconstruction of plots in Fig. 6, except that each trial was explicitly  
831 plotted. Each row represents an individual cell, as in Fig. 6. The median and inter-quartile range for each  
832 cell are presented as the accompanying vertical and horizontal lines, respectively. Colors represent  
833 individual cells and are preserved across all graphs in panels A and B. The cells are sorted by their  
834 median onset latency. Left and right graphs show the responses to two different odors. The black box-  
835 and-whisker plots at the bottom of each panel show the distribution of median onset latency across cells.  
836 A3–4. The same data as in A1–2, but rearranged so that each row represents an individual trial. Note that  
837 the variances in individual rows are markedly reduced. Trials are sorted according to their median onset  
838 latency, not by the order of acquisition. The gray box-and-whisker plots at the bottom of each panel show  
839 the distribution of median onset latency across trials. B. Onset latencies aligned to the median onset  
840 latency within the trial for each data point. C. Inter-quartile ranges (IQRs) of median onset latency across  
841 cells (black box-and-whisker plots in A1–2) and across trials (gray box-and-whisker plots in A3–4) are  
842 compared for all glomerulus–odor pairs. IQRs across cells are smaller in nearly all cases.

843

844 Figure 8. Analyses of the rise time of odor-evoked calcium transients.

845 A. Distribution of rise times, defined as the duration between the points when a signal reached 20% and  
846 80% of peak amplitude. Two overlapping histograms are presented. The blue histogram represents the  
847 distribution of single-cycle stimulation, and the gray one represents the distribution of multi-cycle (2 s)  
848 stimulation. B. Rise times are presented for cells putatively associated with the same glomerulus. All  
849 cases in which rise time was successfully determined in three or more cells are presented. The median is  
850 presented as a diamond, and the inter-quartile range as a horizontal bar. No horizontal bar means that the  
851 inter-quartile range is smaller than the size of the diamond marker. In the right panel (multi-cycle  
852 stimulation), the data from the left panel (single-cycle stimulation) are replicated in gray to facilitate  
853 comparison. Note the logarithmic scale on the x-axis. Expression of the GAD2 marker tdTomato (positive

854 (+) or negative (-) is indicated at the right. The indexes for mouse and glomerulus are shown at the left:  
855 these indexes correspond to those in Fig. 6. C. The relationship between onset latency and peak response  
856 amplitude is plotted. Because peak amplitudes can be compared only within the same cell, only data from  
857 cells in which the rise time was successfully determined for more than one odorant were used in the  
858 analysis (see text for details). Note the logarithmic scale on the x-axis.

859

### Gad2-ires-Cre x tdTomato reporter (Ai9)

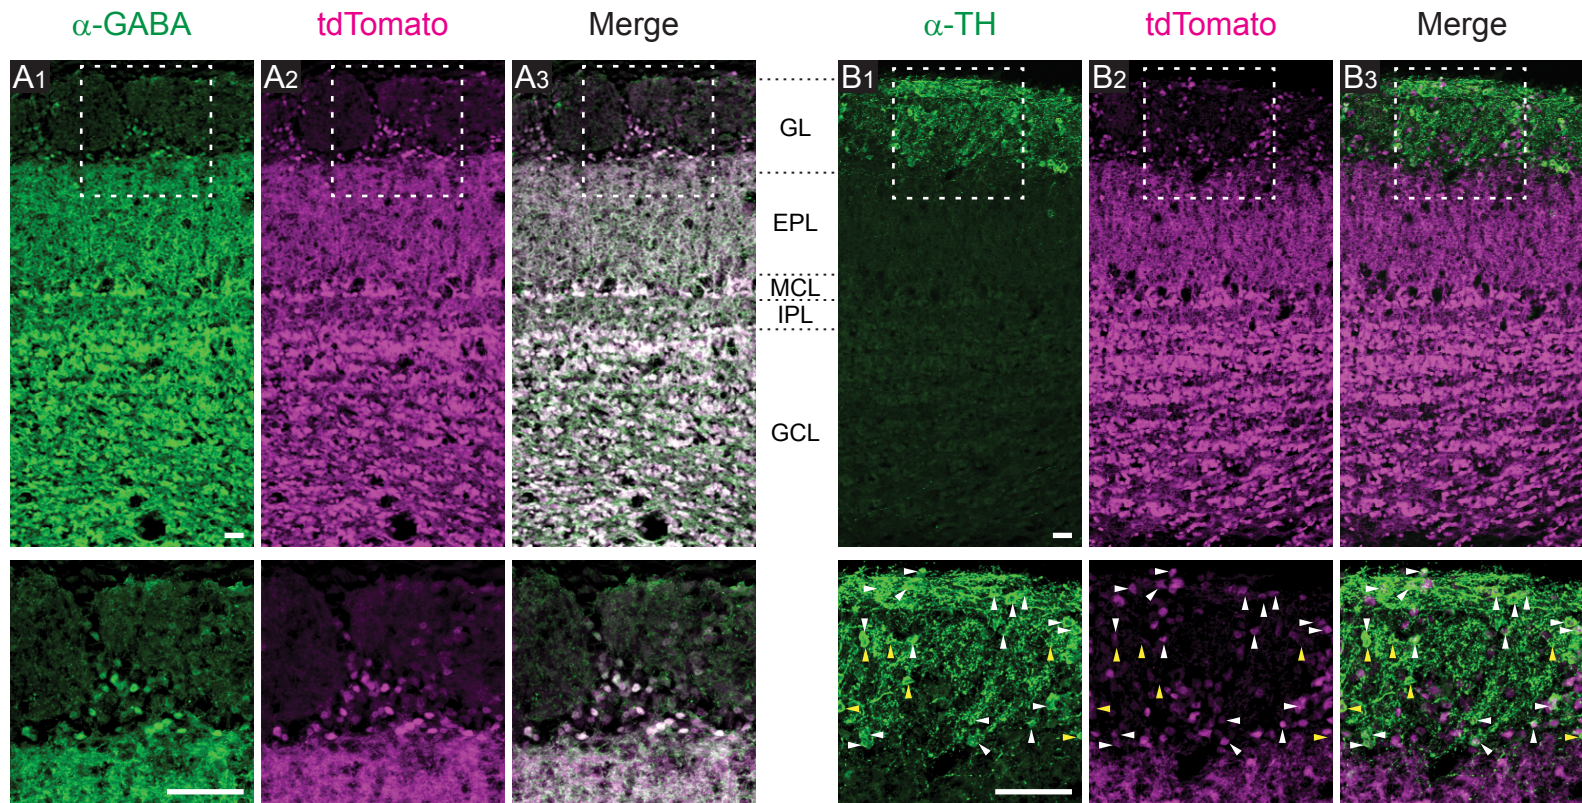

Figure 1. Expression patterns of tdTomato.

The progeny of Gad2-IRES-Cre and cre-dependent tdTomato reporter mice were used in this study. A1–3. Spatial pattern of immunolabeled GABA (A1), tdTomato (A2), and the merged image (A3). The region indicated by a white box in the top panels is presented at a higher magnification in the corresponding bottom panels. B1–3. Spatial pattern of immunolabeled TH (B1), tdTomato (B2), and the merged image (B3). White and yellow arrowheads indicate examples of TH<sup>+</sup>/tdTomato<sup>+</sup> cells and TH<sup>+</sup>/tdTomato<sup>-</sup> cells, respectively. Approximate positions of layer boundaries are indicated by black dotted lines in the space between the panels A3 and B1. Scale bars: 50 μm.



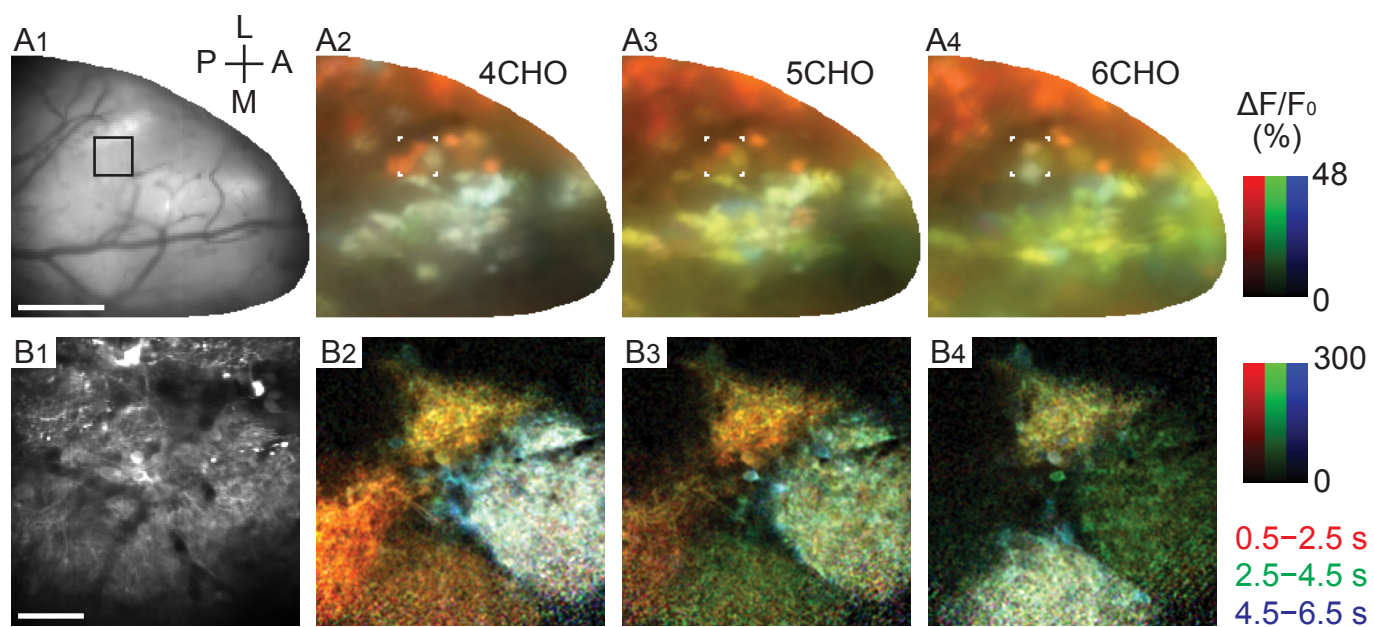

Figure 2. Activity ( $\Delta F/F_0$ ) maps color-coded by the phase of response in wide-field and two-photon imaging.

A1. Surface image for wide-field (single-photon) imaging. Scale bar: 500  $\mu\text{m}$ . A2–4. Maps of odor-evoked response to 4CHO, 5CHO, and 6CHO, respectively. Each map is a synthesis of red, green, and blue maps that represent the periods 0.5–2.5, 2.5–4.5, and 4.5–6.5 s after stimulus onset, respectively. B1. A two-photon image of the selected area, indicated by the black box in A1 and by white corners in A2–4. Scale bar: 50  $\mu\text{m}$ . B2–4. Maps of odor-evoked response, with the colors representing the same periods as in A2–4.

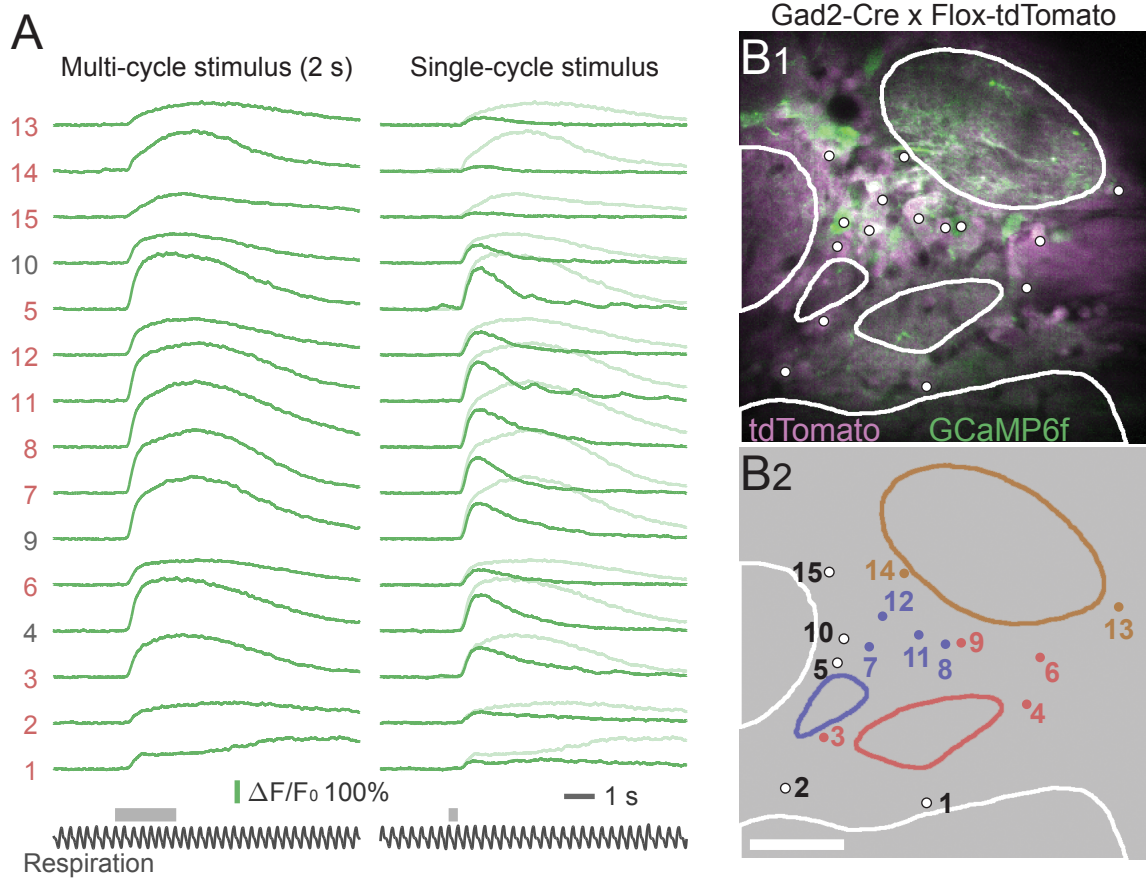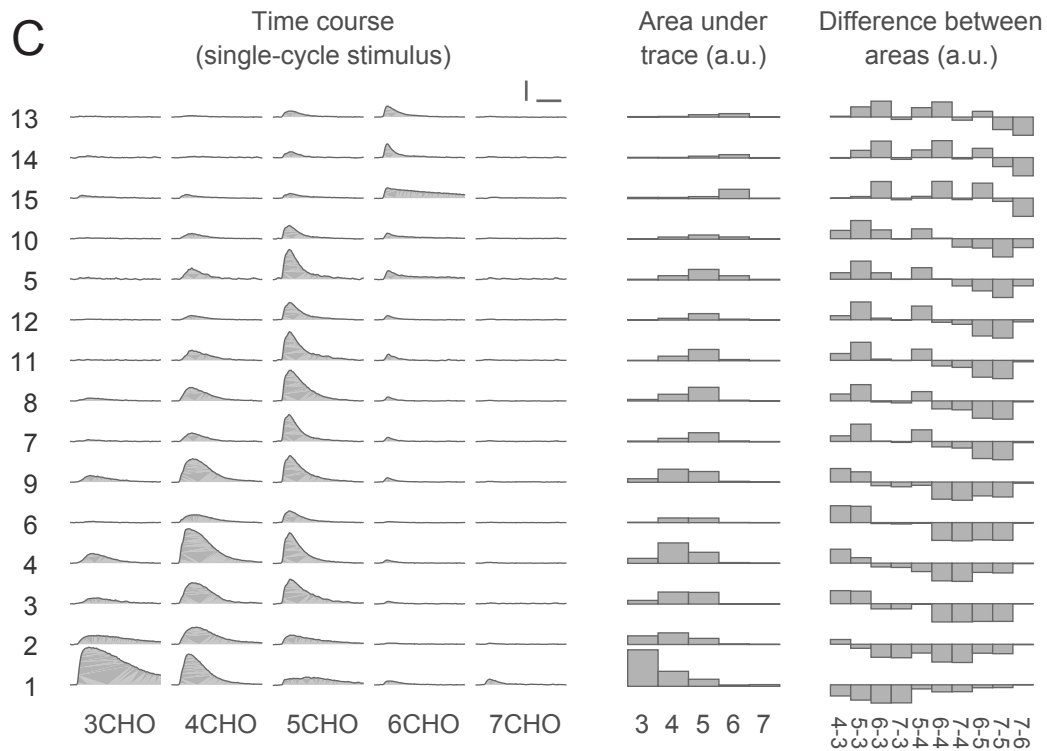

Figure 3. Odor-evoked calcium transients and grouping of JG cells by response profile.

A. An example data set from a single trial of random-access scanning of 15 ROIs (cells). Left traces are responses to a 2 s odor stimulus, and right traces are responses to a single-respiration-cycle stimulus. The bottom black traces show the respiration signal. Gray horizontal bars above the respiration signals indicate the timing of valve opening for odor presentation. Note that actual odor presentation lags approximately 0.1 s behind the valve opening. The ordering of the ROIs is intentional, based on the result of grouping shown in C. B. Two-photon image of the recording site (B1) and the ROI indexes (B2). Dots and contours represent the ROIs and glomeruli, respectively. Non-white colors of dots and contours in B2 indicate the groups presented in C. Scale bar: 50  $\mu\text{m}$ . C. Odor-evoked responses of the same ROIs to five odors (single-cycle stimulus). The left block shows the response time courses. The middle block shows the areas under the time courses as bar charts. The right block shows the difference in areas between every possible pair of odors. Colored vertical lines at the right indicate the groups of cells putatively associated with the same glomerulus (see text for details). Scale bars: 3 s (horizontal), 100%  $\Delta F/F_0$  (vertical).

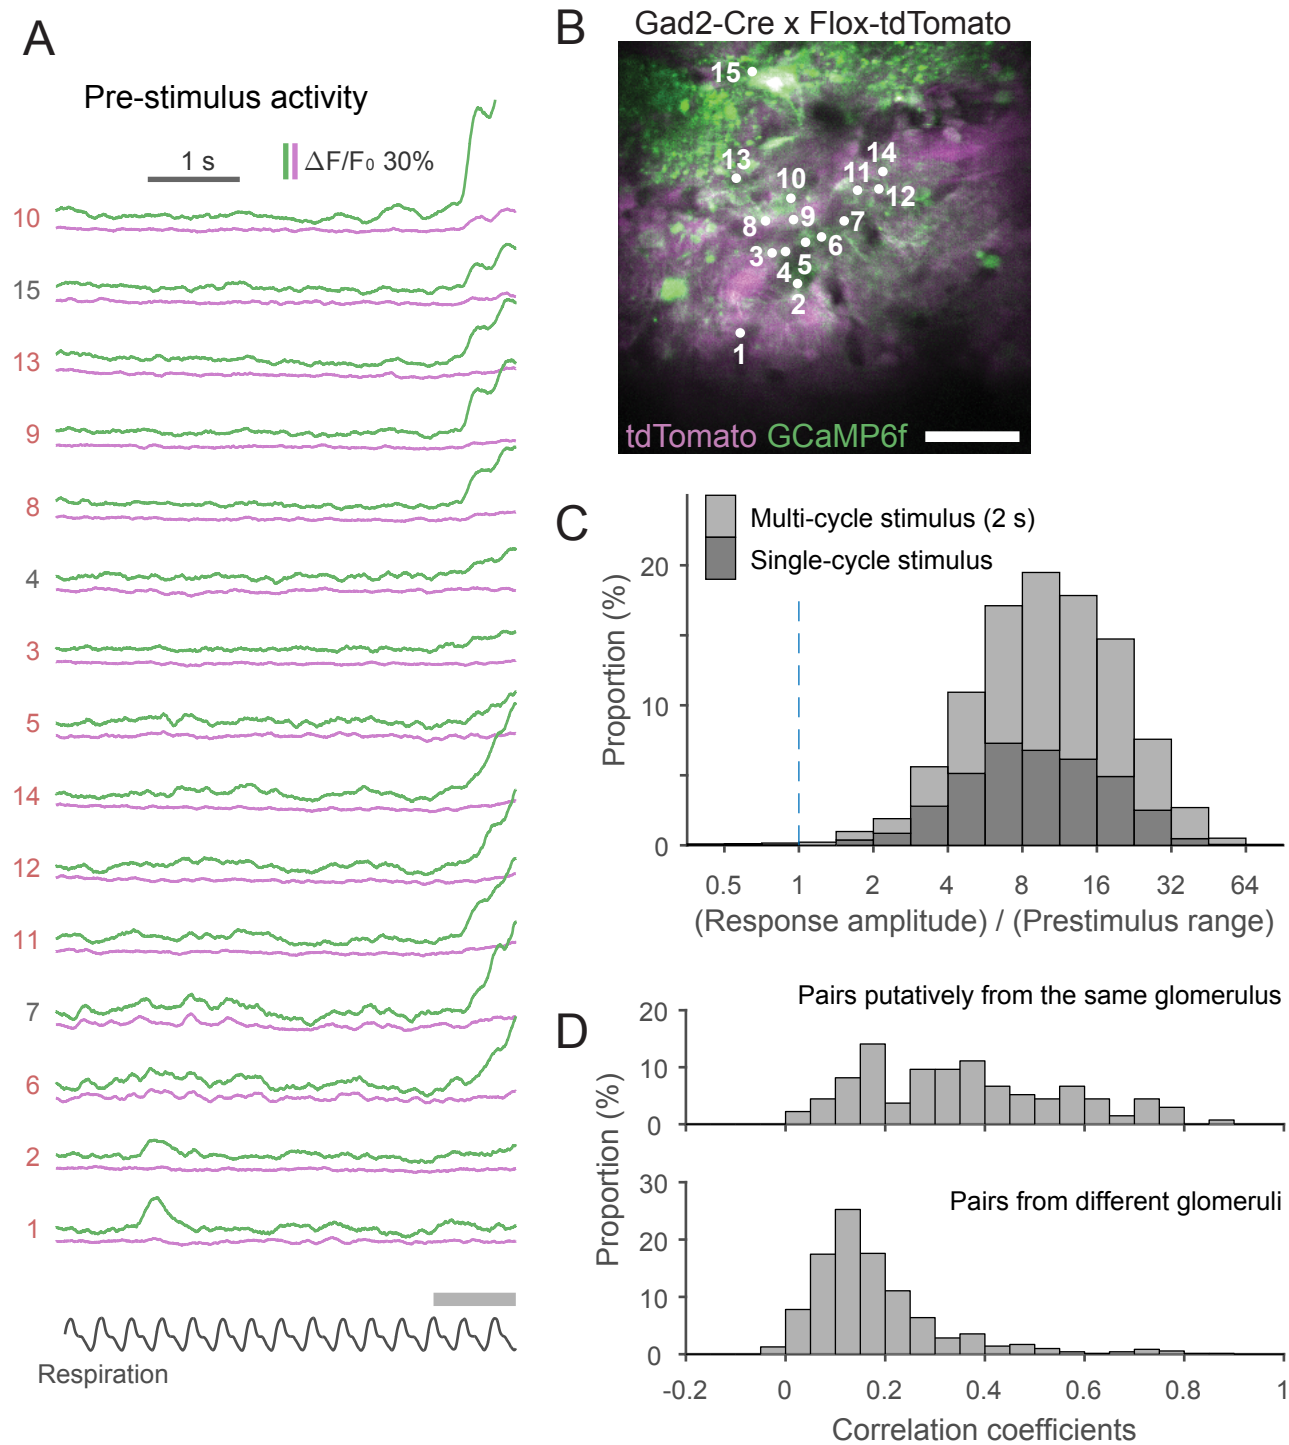

Figure 4. Characterization of calcium signals in the pre-stimulus period.

A. An example data set from the pre-stimulus period in a trial. Green traces are the signal from the green channel (GCaMP6f), and magenta traces are the signal from the red channel (tdTomato). Apparent odor-evoked changes in some of the magenta traces (e.g., ROI 10) suggest a minor contribution of the GCaMP signal to the red channel. The relative contribution from the GCaMP signal may vary depending on the relative expression levels of GCaMP and tdTomato at an individual ROI. B. Two-photon image of the recording site with ROIs and their indexes. Scale bar: 50  $\mu\text{m}$ . C. Stacked histogram of the ratio between peak response amplitude and range (the distance between the 1st and 99th percentiles) in the pre-stimulus period. Note the logarithmic scale on the x-axis. The response is much larger than the fluctuations in the pre-stimulus period in the vast majority of cases. D. Histograms showing the distribution of pairwise correlation coefficients for the time courses of activity during the pre-stimulus period. Upper and lower histograms show data from cell pairs putatively associated with the same glomerulus and pairs from different glomeruli, respectively.

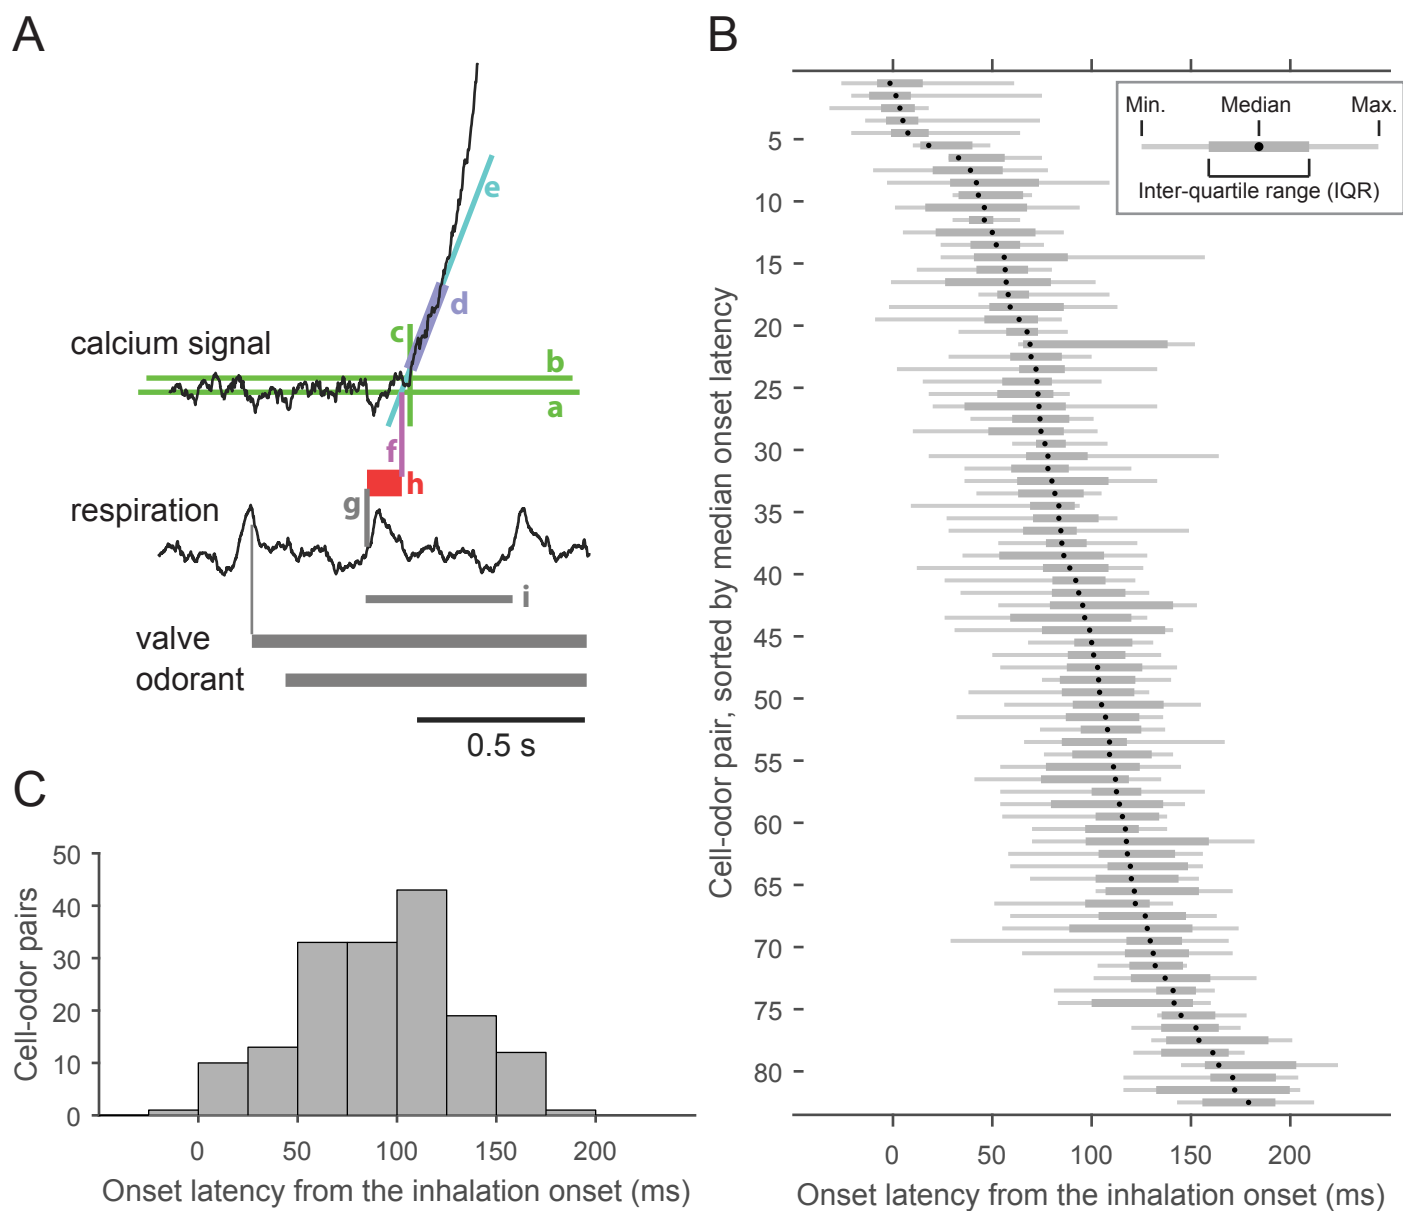

Figure 5. Onset latencies of odor-evoked calcium transients are heterogeneous across JG cells.

A. Graphic representation of the definition of onset latency. (a) Baseline, defined as the mean of the pre-stimulus period signal. (b) Threshold, defined as 2.5 times the standard deviation of the pre-stimulus period signal. (c) Time point at which the signal exceeds the threshold. (d) Time window of the first 100 ms above the threshold. (e) Regression line of the signal in the 100 ms time window. (f) Point where the regression line crosses the baseline. This time point is considered the onset of the calcium transient. (g) Onset of the first inhalation with the odor stimulus. (h) Onset latency, defined as the distance between the onset of inhalation and the onset of the calcium transient. B. Distribution of onset latencies. Each row represents a single cell–odor pair as a box-and-whisker plot (see inset). Cell–odor pairs are arranged according to median onset latency for clarity (83 cell–odor pairs from 8 recording sites, out of all 165 pairs, are presented). Each box-and-whisker plot represents data from 5–17 trials. C. Histogram showing the distribution of medians shown in B.



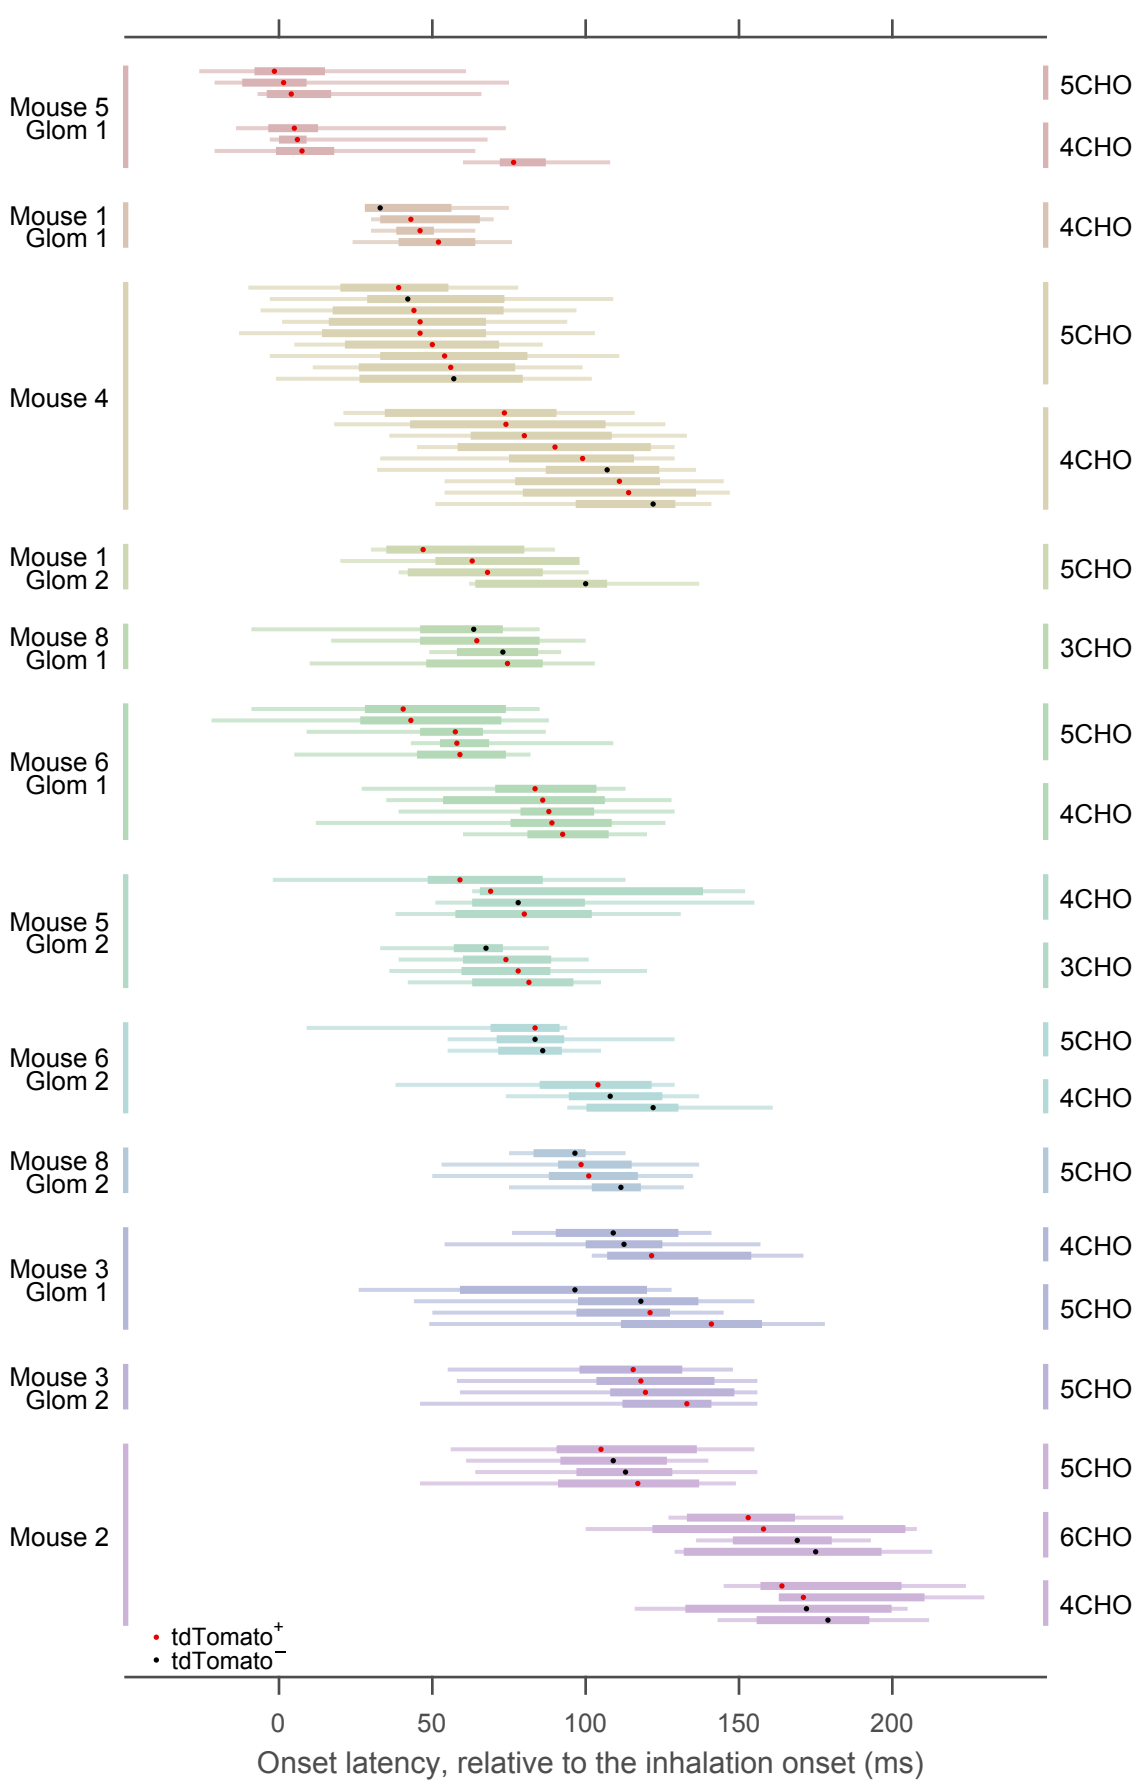

Figure 6. JG-cell onset latency strongly depends on the putative glomerular association.

A subset of the box-and-whisker plot from Fig. 5 is presented, rearranged according to glomerulus–odor pairs. Different glomeruli are presented in different colors. In some of the glomeruli, data from more than one odorant were available. Dots in the box-and-whisker plots represent the median, and expression of the GAD2 marker tdTomato is indicated by the dot color (red for tdTomato<sup>+</sup> and black for tdTomato<sup>-</sup>). Mouse and glomerulus identity are at the left. Odorant is indicated at the right.

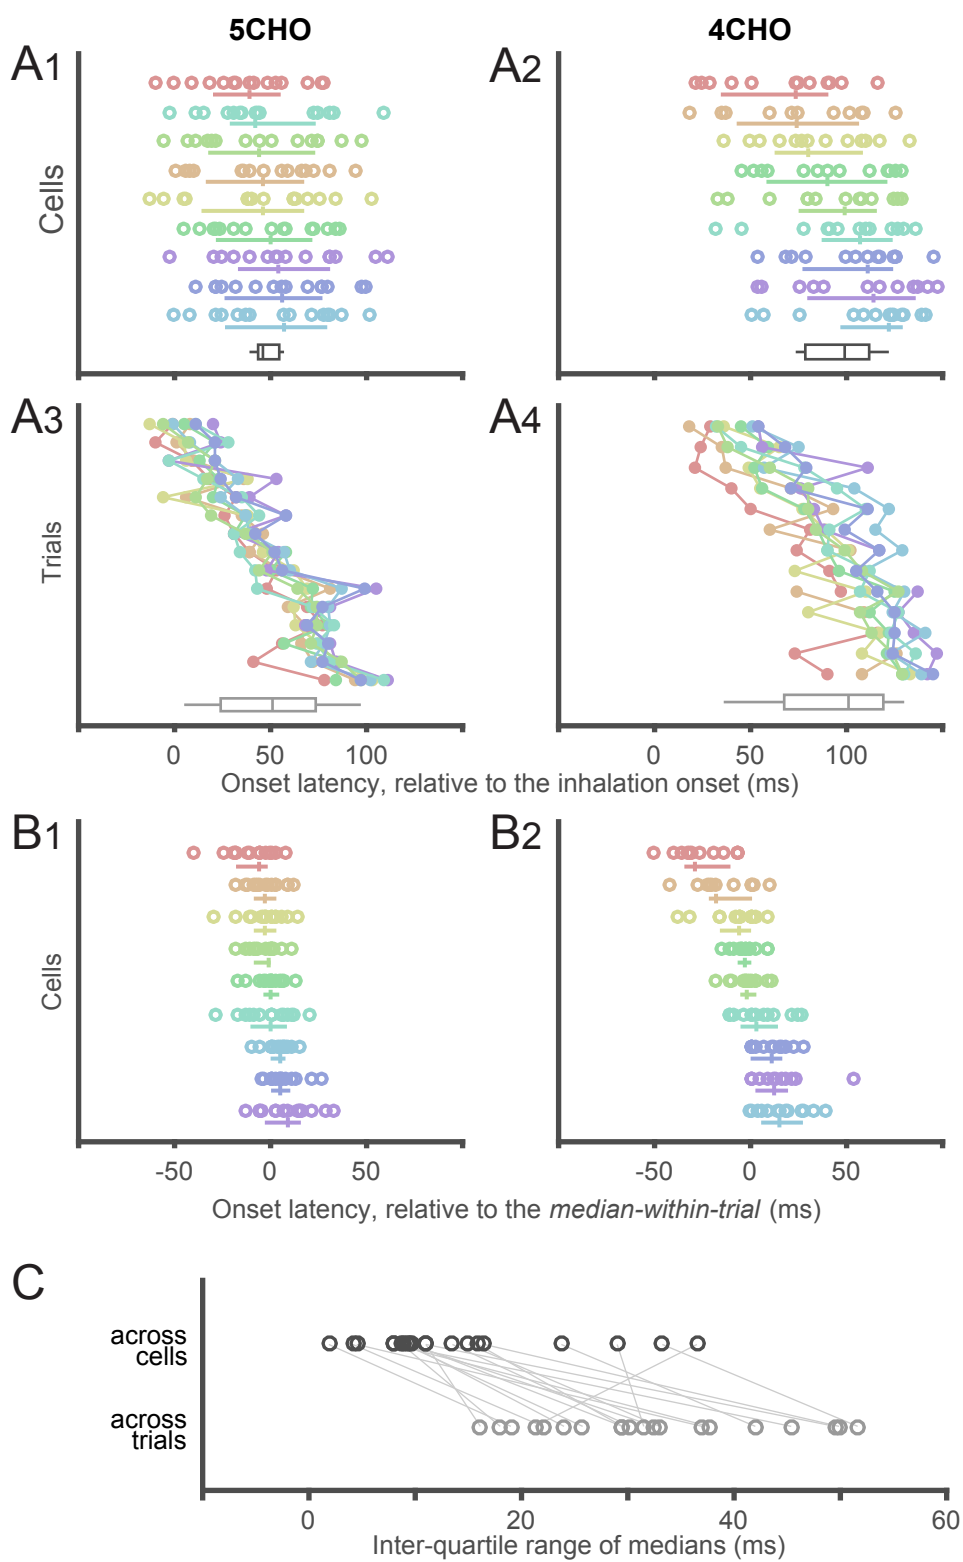

Figure 7. Detailed analysis of onset latency across cells putatively associated with the same glomerulus.

The onset latencies of cell–odor pairs from a glomerulus in mouse 4 (see Fig. 6) are presented with an alternative visualization. A1–2. Reconstruction of plots in Fig. 6, except that each trial was explicitly plotted. Each row represents an individual cell, as in Fig. 6. The median and inter-quartile range for each cell are presented as the accompanying vertical and horizontal lines, respectively. Colors represent individual cells and are preserved across all graphs in panels A and B. The cells are sorted by their median onset latency. Left and right graphs show the responses to two different odors. The black box-and-whisker plots at the bottom of each panel show the distribution of median onset latency across cells. A3–4. The same data as in A1–2, but rearranged so that each row represents an individual trial. Note that the variances in individual rows are markedly reduced. Trials are sorted according to their median onset latency, not by the order of acquisition. The gray box-and-whisker plots at the bottom of each panel show the distribution of median onset latency across trials. B. Onset latencies aligned to the median onset latency within the trial for each data point. C. Inter-quartile ranges (IQRs) of median onset latency across cells (black box-and-whisker plots in A1–2) and across trials (gray box-and-whisker plots in A3–4) are compared for all glomerulus–odor pairs. IQRs across cells are smaller in nearly all cases.

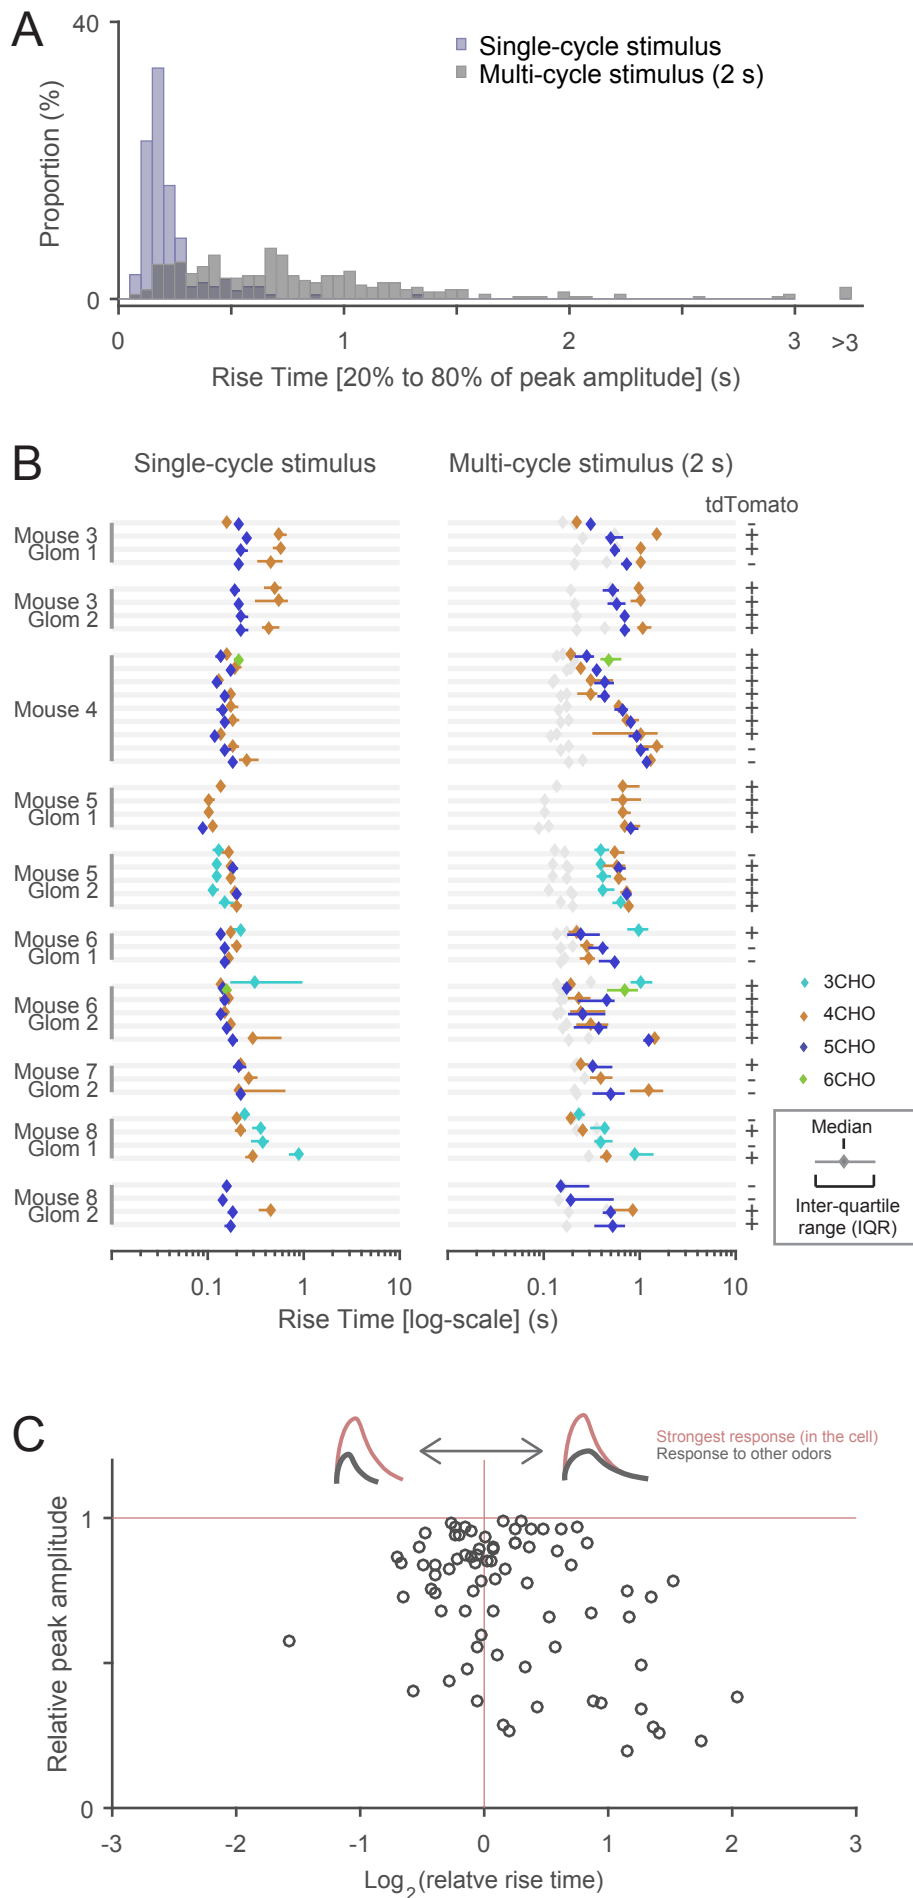

Figure 8. Analyses of the rise time of odor-evoked calcium transients.

A. Distribution of rise times, defined as the duration between the points when a signal reached 20% and 80% of peak amplitude. Two overlapping histograms are presented. The blue histogram represents the distribution of single-cycle stimulation, and the gray one represents the distribution of multi-cycle (2 s) stimulation. B. Rise times are presented for cells putatively associated with the same glomerulus. All cases in which rise time was successfully determined in three or more cells are presented. The median is presented as a diamond, and the inter-quartile range as a horizontal bar. No horizontal bar means that the inter-quartile range is smaller than the size of the diamond marker. In the right panel (multi-cycle stimulation), the data from the left panel (single-cycle stimulation) are replicated in gray to facilitate comparison. Note the logarithmic scale on the x-axis. Expression of the GAD2 marker tdTomato (positive (+) or negative (-)) is indicated at the right. The indexes for mouse and glomerulus are shown at the left: these indexes correspond to those in Fig. 6. C. The relationship between onset latency and peak response amplitude is plotted. Because peak amplitudes can be compared only within the same cell, only data from cells in which the rise time was successfully determined for more than one odorant were used in the analysis (see text for details). Note the logarithmic scale on the x-axis.
